## **Silencing of *Mu* elements in maize involves distinct populations of small RNAs and distinct patterns of DNA methylation**

Diane Burgess<sup>1</sup>, Hong Li<sup>2</sup>, Meixia Zhao<sup>3</sup>, Sang Yeol Kim<sup>4</sup> and Damon Lisch<sup>5</sup>

<sup>1</sup> Department of Plant and Microbial Biology, University of California Berkeley

<sup>2</sup> Monsanto company, Chesterfield, MO

<sup>3</sup> Department of Biology, Miami University, Oxford, Ohio 45056

<sup>4</sup> US Department of Agriculture, Agricultural Research Service (USDA-ARS), Urbana, IL

<sup>5</sup> Department of Botany and Plant Pathology, Purdue University, West Lafayette, IN

Corresponding author:

Damon Lisch

Associate Professor

Purdue University

Department of Botany and Plant Pathology

915 West State Street

West Lafayette, IN 47907

Phone, office: (765) 496-0197

Phone, lab: (765) 496-0213

Email: [dlishch@purdue.edu](mailto:dlishch@purdue.edu)

Key words: maize, *Mutator*, transposon, epigenetic, methylation.

## 1 **Summary**

2 Transposable elements (TEs) are a ubiquitous feature of plant genomes. Because of the  
3 threat they pose to genome integrity, most TEs are epigenetically silenced. However, even  
4 closely related plant species often have dramatically different populations of TEs,  
5 suggesting periodic rounds of activity and silencing. Here we show that the process of *de*  
6 *novo* methylation of an active element in maize involves two distinct pathways, one of  
7 which is directly implicated in causing epigenetic silencing and one of which is the result  
8 of that silencing.

9

## 10 **Abstract**

11 Epigenetic changes involve changes in gene expression that can be heritably transmitted  
12 to daughter cells in the absence of changes in DNA sequence. Epigenetics has been  
13 implicated in phenomena as diverse as development, stress response and carcinogenesis.  
14 A significant challenge facing those interested in investigating epigenetic phenomena is  
15 determining causal relationships between DNA methylation, specific classes of small  
16 RNAs and associated changes in gene expression. Because they are the primary targets  
17 of epigenetic silencing in plants and, when active, are often targeted for *de novo*  
18 silencing, transposable elements (TEs) represent a valuable source of information about  
19 these relationships. We use a naturally occurring system in which a single TE can be  
20 heritably silenced by a single derivative of that TE. By using this system it is possible to  
21 unravel causal relationships between different size classes of small RNAs, patterns of  
22 DNA methylation and heritable silencing. Here, we show that the long terminal inverted  
23 repeats (TIRs) within *Zea mays* *MuDR* transposons are targeted by distinct classes of

24 small RNAs during epigenetic silencing that are dependent on distinct silencing  
25 pathways. Further, these small RNAs target distinct regions of the TIRs, resulting in  
26 different patterns of cytosine methylation with different functional consequences with  
27 respect to epigenetic silencing and heritability of that silencing.

## 28 **Introduction**

29 Plant genomes are host to large numbers of potentially deleterious endogenous  
30 mutagens known as transposable elements (TEs). Due to the activity of a sophisticated  
31 regulatory system, the vast majority of TEs are epigenetically silenced (SLOTKIN and  
32 MARTIENSSEN 2007; LISCH 2009; LAW and JACOBSEN 2010; BUCHER *et al.* 2012;  
33 SIGMAN and SLOTKIN 2016). This silencing is associated with DNA methylation and  
34 modification of histones, and can be propagated over many generations (LISCH 2009;  
35 SAZE and KAKUTANI 2011).

36 Because most transposons are silenced most of the time, much of what we know  
37 about TE silencing involves maintenance, rather than initiation of silencing. However,  
38 recent work suggests that aberrant RNAs can trigger silencing of otherwise active TEs  
39 via a pathway that involves the production of *trans*-acting 21-22 nt small RNAs via the  
40 activity components of both the Post Transcriptional Gene Silencing (PTGS) and the  
41 Transcriptional Gene Silencing (TGS) pathways (LI *et al.* 2010; MARI-ORDONEZ *et al.*  
42 2013; NUTHIKATTU *et al.* 2013; FULTZ *et al.* 2015; CUERDA-GIL and SLOTKIN 2016). The  
43 available data suggests that Pol II transcripts from active TEs are recognized by small  
44 RNAs that then act as triggers for RDR6/SGS3-mediated production of dsRNAs using  
45 RNA directed RNA polymerase 6 (RDR6) in conjunction with Suppressor of Gene  
46 Silencing 3 (SGS3). The resulting double-stranded RNA is then processed into 21-22 nt  
47 *trans*-acting small RNAs by Dicer like 2 (DCL2) or Dicer like 4 (DCL4). These small  
48 RNAs are then incorporated into a complex that includes Argonaute 6 (AGO6), which is  
49 then competent to trigger *de novo* and heritable TGS using Pol V transcript arising from  
50 the active elements as a scaffold (FULTZ *et al.* 2015; MCCUE *et al.* 2015; CUERDA-GIL

51 and SLOTKIN 2016; FULTZ and SLOTKIN 2017). The initial triggers for silencing are not  
52 always well understood, but it appears that they may be small RNAs derived from the Pol  
53 II transcript itself, or from an unlinked aberrant version of the TE (SLOTKIN *et al.* 2005;  
54 MARI-ORDONEZ *et al.* 2013; CREASEY *et al.* 2014).

55       Following the initiation of silencing via *trans*-acting small RNAs, TE silencing  
56 can be maintained by stable propagation of CG and CHG methylation, as well as  
57 reinforcement via 24 nt small RNAs derived from Pol IV transcripts that are tethered to  
58 the target gene via a Pol V transcript (MATZKE and MOSHER 2014; HOLOCH and MOAZED  
59 2015). Maintenance of silencing in the germ line is enhanced via small RNA-mediated  
60 transcriptional silencing in lineages adjacent to but distinct from the germinal lineage  
61 (MARTINEZ and SLOTKIN 2012). This results in a recapitulation of the initial silencing  
62 event, in which expression of otherwise inactive elements triggers production of *trans*-  
63 acting small RNAs that are then thought to be transported to the germinal lineage  
64 (SLOTKIN *et al.* 2009; LI *et al.* 2010; CREASEY *et al.* 2014). The net effect of this process  
65 is that active TEs can be recognized and silenced, and potentially active TEs can be kept  
66 in a stably silenced state over long periods of time.

67       The initiation and maintenance of TE silencing is particularly well characterized  
68 in the *Mutator* system in maize, primarily because the autonomous regulator of the  
69 system can be heritably silenced by a *trans*-acting locus called *Mu killer* (*Muk*), a  
70 naturally occurring derivative of *MuDR* that expresses a long hairpin transcript (SLOTKIN  
71 *et al.* 2003; SLOTKIN *et al.* 2005). This transposon system is composed of several related  
72 classes of cut and paste elements, all of which share similar, ~200 bp terminal inverted  
73 repeats (TIRs) but each of which carries unique internal sequences (LISCH 2002). The

74 system is regulated by autonomous *MuDR* elements, which carry two genes: *mudrA*,  
75 which encodes the putative transposase MURA, and *mudrB*, which encodes the helper  
76 protein MURB (Figure 1) (HERSHBERGER *et al.* 1995; LISCH *et al.* 1999). Expression of  
77 *mudrA* and *mudrB* is convergent, with transcripts from each gene originating from within  
78 the 220 bp TIRs adjacent to each gene and extending towards the middle of the element  
79 (Figure 1). In our lines, activity of *MuDR* is monitored by a reporter element, a non-  
80 autonomous *Mu1* element located in the *a1-mum2* allele of the *A1* gene, whose function  
81 is required for color expression in both the plant and the seed (CHOMET *et al.* 1991). In  
82 the seed, *Mu1* excises from *a1-mum2* somatically in the presence of a functional *MuDR*  
83 element, giving rise to spotted kernels. In the absence of functional *MuDR* elements, the  
84 kernels are uniformly pale.

85         Also present in this and likely all maize lines are *MuDR* derivatives called  
86 *hMuDR* elements (RUDENKO and WALBOT 2001). Although nearly identical to portions  
87 of *MuDR*, none of these elements are intact and they do not appear to contribute to  
88 *Mutator* activity, either positively or negatively (LISCH and JIANG 2008). They are,  
89 however, a source of nuclear localized transcript and are thus the likely source of the  
90 abundant *MuDR*-similar small RNAs that have been observed in immature ears and  
91 embryos (RUDENKO *et al.* 2003; WOODHOUSE *et al.* 2006; NOBUTA *et al.* 2008). Finally,  
92 the reference maize genome contains a limited number of non-autonomous *Mu* elements  
93 with high homology within their TIRs to known active *Mu* elements (LISCH 2015). The  
94 available data suggests that both *hMuDRs* and non-autonomous elements are targeted by  
95 24-26 nt small RNAs that are dependent on the RNA-directed DNA methylation pathway  
96 (NOBUTA *et al.* 2008; HALE *et al.* 2009).

97 Active *MuDR* elements can be heritably and reliably silenced by genetically  
98 combining them with *Mu killer* (*Muk*), whose transcript is identical to a portion of the  
99 *mudrA* gene, as well as its associated TIR (TIRA) (Figure 1). In active *MuDR* elements,  
100 TIRA is devoid of DNA methylation. In contrast, in plants carrying both *Muk* and  
101 *MuDR*, TIRA sequences are densely methylated in all three sequence contexts, CG, CHG  
102 and CHH (where H represents any nucleotide but guanine) (LI *et al.* 2010). This  
103 methylation and the associated silencing of the *MuDR* element, can be heritably  
104 propagated over many generations, even in the absence of *Muk* (SLOTKIN *et al.* 2003).

105 Interestingly, we have found that silencing of *MuDR* by *Muk* is sensitive to  
106 changes in components of the *trans*-acting silencing (tasiRNA) pathway. Specifically, we  
107 found that a transient loss of expression of *Leafbladeless1* (*lbl1*), the maize homolog of  
108 SGS3, in leaves that emerge during the transition from juvenile to adult growth is  
109 associated with an alleviation of transcriptional silencing of the *mudrA* gene (LI *et al.*  
110 2010). Since SGS3 works in conjunction with RDR6 to produce secondary double-  
111 stranded RNAs (KUMAKURA *et al.* 2009), this suggests that silencing of *MuDR* elements  
112 in leaves requires production of secondary dsRNAs triggered by small RNAs produced  
113 by the hairpin *Muk* transcript.

114 Here we show that cytosine methylation of different regions within the *MuDR*  
115 TIR has distinct causes and consequences, and corresponds to distinct populations of  
116 small RNAs derived from the *Muk* hairpin, the *mudrA* transcript, and other *Mu* elements  
117 in the maize genome. In addition, we demonstrate that although active *MuDR* elements  
118 can reverse methylation at one end of the TIR of a silenced *MuDR* element, they do not  
119 heritably reactivate that silenced element, nor does the silenced element inactivate the

120 active element. Finally, we demonstrate that the previously described transient relaxation  
121 of *Muk*-induced silencing of *MuDR* during vegetative change (LI *et al.* 2010) is  
122 associated with a dramatic reduction in small RNAs targeting that element.

123

## 124 RESULTS

### 125 **The absence of transposase results in default methylation of cytosines in all sequence** 126 **contexts at TIRs of non-autonomous elements.**

127         When *Mutator* activity is lost due to silencing or genetic segregation of  
128 autonomous *MuDR* elements, methyl-sensitive sites within the TIRs of non-autonomous  
129 *Mu* transposons such as *Mu1* at *al-mum2* become methylated (CHANDLER and WALBOT  
130 1986; CHOMET *et al.* 1991). This methylation is fully reversible when a source of  
131 transposase is added, and invariably occurs when transposase is lost. Indeed this can  
132 occur in somatic sectors in developing plants when spontaneous deletions within *MuDR*  
133 elements occur, suggesting that the RNA directed DNA methylation (RdDM) pathway is  
134 competent to trigger *de novo* methylation of *Mu* elements during somatic development  
135 (CHOMET *et al.* 1991; LISCH and JIANG 2008). Recent work has demonstrated that this  
136 default methylation requires a component of the RdDM pathway, *MOP1*, a protein that is  
137 homologous to *Arabidopsis* RNA-DEPENDENT RNA POLYMERASE II (LISCH *et al.*  
138 2002; ALLEMAN *et al.* 2006; WOODHOUSE *et al.* 2006). This has led to the suggestion that  
139 the TIRs of non-autonomous elements are subject to a default methylation pathway that  
140 operates in the absence of the transposase but that can be blocked and even reversed by  
141 the presence of the transposase (HERSHBERGER *et al.* 1995; LISCH *et al.* 1995; BENITO  
142 and WALBOT 1997). However, this conclusion has been based on a limited number of



143 restriction enzyme sites within the TIRs of non-autonomous elements. We wanted to  
144 understand the distribution and nature of this methylation more fully, so we examined  
145 methylation of the TIR of the non-autonomous *MuI* element inserted into the *AI* gene in  
146 the *al-mum2* (O'REILLY *et al.* 1985; CHOMET *et al.* 1991) allele using bisulfite  
147 sequencing.

148         The results were entirely consistent with previous observations. In the absence of  
149 transposase, the *MuI* TIR is extensively methylated in all three sequence contexts,  
150 although it is interesting to note that methylation of this TIR is much higher in the 5' end  
151 of the TIR (62% methylated cytosines in the first 110 nt) than the 3' end of the TIR (11%  
152 methylated cytosines in the second 110 nt), only marginally more than the 3% observed  
153 in the presence of the transposase (Figure 2). The 5' end of the TIR contains sequences  
154 known to bind the MURA protein (BENITO and WALBOT 1997); the 3' end of the TIR has  
155 two binding sites for unknown proteins that were previously identified (ZHAO and  
156 SUNDARESAN 1991). Methylation was restricted to the *MuI* TIR and did not extend into  
157 adjacent *AI* promoter sequences. In plants carrying an active *MuDR* element, nearly all  
158 of the *MuI* methylation was lost, indicating that the presence of the transposase is  
159 sufficient to remove that methylation.

160         Because the *MuI* TIR is not identical to that of *MuDR* (roughly 83% identity over  
161 200 bp, with the highest degree of identity - 88% - within the first 100 bp), we wanted to  
162 examine the effects of the transposase on a non-autonomous element with TIRs that are  
163 identical to those of *MuDR*. Fortunately, we had available a direct derivative of *MuDR*  
164 (*MuDR-d107*, or *d107*) that is identical to the autonomous element with the exception of  
165 a 700 bp deletion within a conserved portion of the *mudrA* transposase gene (LISCH 1995;

166 LISCH and JIANG 2008) (Figure 1). As is the case for other *MuDR* deletion derivatives,  
167 sequence analysis of the deletion in *dI07* suggests that it arose as a consequence of strand  
168 slippage during gap repair following excision of *MuDR(p1)* (Figure S1) (HSIA and  
169 SCHNABLE 1996). This derivative cannot cause excision of the reporter element, nor can  
170 it trigger hypomethylation of non-autonomous elements, suggesting that it does not make  
171 a functional transposase. However, it is transcriptionally active, producing a full-length  
172 *mudrB* transcript and a polyadenylated but internally deleted *mudrA* transcript. *dI07* also  
173 has the advantage of being at the same chromosomal location as the originally cloned  
174 *MuDR* element at position 1 on chromosome 3L (*p1*) (CHOMET *et al.* 1991) and can be  
175 efficiently silenced by *Muk* (SLOTKIN 2005). Thus, the only difference between *dI07* and  
176 the functional *MuDR* from which it was derived is the presence of the deletion.

177         Examination of the TIR of *dI07* revealed that the default methylation that we  
178 observed at *MuI* also occurs within the *dI07* TIR. As in the case of *MuI*, methylation  
179 was largely restricted to the 5' end of the TIR (Figure 3B). With this in mind, we have  
180 split analysis of this TIR into 5' (5'TIRA) and 3' (3'TIRA) portions (Figure 1A).  
181 5'TIRA includes the first 144 bp of TIRA. This region of the TIR includes the binding  
182 site for the transposase (MURA) (BENITO and WALBOT 1997) and is the most highly  
183 conserved region among *Mu* elements (BENNETZEN 1996). 3'TIRA includes the last 75  
184 bp of the TIR along with 69 bp of internal sequences corresponding to a portion of the  
185 *mudrA* 5' UTR. This region includes both of the alternative transcriptional start sites for  
186 *mudrA* (HERSHBERGER *et al.* 1995).

187         Within transcriptionally active *dI07*, 68% of the cytosines in 5'TIRA were  
188 methylated. In contrast, only 7% of the cytosines in 3'TIRA were methylated (Figure

189 3B;  $P < 0.0001$ , Fisher's exact test). These data indicate that the default methylation  
190 observed at *MuI* is also observed at *d107*. However, because *d107* is transcriptionally  
191 active, we can conclude that the dense methylation we observe in 5'TIRA in all sequence  
192 contexts in this derivative is not sufficient to trigger transcriptional silencing.

193 In order to determine the effects of *Muk* on *d107* a plant carrying *d107* was  
194 crossed to a plant carrying *Muk* and the pattern of methylation at TIRA was examined in  
195 a progeny plant carrying both *d107* and *Muk* (Figure 3A). In this plant, the level of  
196 methylation of 5'TIRA was quite similar to that observed in *d107* not exposed to *Muk*  
197 (78% and 69%, respectively) ( $P = 0.2327$ , Fisher's exact test). In contrast, exposure to  
198 *Muk* caused extensive CG and CHG methylation of 3'TIRA of *d107* (30%), significantly  
199 higher than was observed in *d107* by itself (7%) ( $P < 0.0001$ , Fisher's exact test). This  
200 pattern of methylation is nearly identical to that seen in TIRA of *MuDR* elements as they  
201 are being silenced by *Muk* in immature ears (Li *et al.* 2010).

202 Interestingly, we find that the sequence context of the methylated cytosines is  
203 quite different between 5'TIRA and 3'TIRA of *d107*. In both *d107* and in F1 *d107;Muk*  
204 plants the cytosines are densely methylated in all three sequence contexts in 5'TIRA. In  
205 contrast, in 3'TIRA, cytosine methylation in the CHH context was uniformly low (4% for  
206 *d107* and 5% for *d107;Muk*) ( $P = 0.6210$ , Fisher's exact test), but CG and CHG was  
207 considerably enriched in *d107;Muk* relative to *d107* plants in 3'TIRA (67% versus 16%  
208 for CG ( $P < 0.0001$ , Fisher's exact test), and 42% versus 3% for CHG, respectively ( $P <$   
209  $0.0001$ , Fisher's exact test). Collectively, from the examination of *d107*, we conclude  
210 that methylation of 5'TIRA is independent of transcriptional silencing, and that exposure  
211 of transcriptionally active *d107* to *Muk* induces new CG and CHG methylation to the

212 3'TIRA, the region that includes both alternative transcriptional start sites. These data  
213 suggest that 5'TIRA and 3'TIRA methylation may involve distinct molecular  
214 mechanisms that result in distinct patterns of cytosine methylation.

215

216 **Active elements remove default methylation within silenced elements but do not**  
217 **heritably reactivate them.**

218 Having established the nature of default methylation, and the distinction between  
219 default methylation and methylation induced by *Muk* at *d107*, we sought to examine the  
220 effects of an active element on a previously silenced element. To do this, we crossed a  
221 plant carrying *MuDR* at position 1 (henceforth referred to as “p1”) to a plant carrying  
222 *Muk*. Previous analysis had determined *MuDR* TIRA is densely methylated in the mature  
223 leaves and immature ears of F1 (*p1*<sup>-</sup>;*Muk*<sup>-</sup>) plants (LI *et al.* 2010). Plants carrying p1  
224 and *Muk* were crossed to plants carrying an active *MuDR* element at a second  
225 chromosomal position (referred to as “p5”) (Figure 4A) (SINGH *et al.* 2008). A progeny  
226 plant carrying p1 that had been silenced in the previous generation but that no longer  
227 carried *Muk* (referred to as p1\*) was then compared to a sibling carrying both p1\* and p5  
228 in order to examine the heritability of silencing and the effects of an active element on a  
229 silenced element. Consistent with the fact that *Muk* induces heritable silencing of *MuDR*  
230 elements, p1\* by itself was extensively methylated. Overall, 5'TIRA of p1\* had 81%  
231 methylated cytosines and 3'TIRA had 48%, similar to the levels of methylation in F1  
232 (*p1*<sup>-</sup>;*Muk*<sup>-</sup>) plants (LI *et al.* 2010). These data confirm our previous observation that  
233 methylation at 5'TIRA established due to the presence of *Muk* is maintained in  
234 subsequent generations in its absence (LI *et al.* 2010). Analysis of a sibling plant that

235 carried both p1\* and p5 revealed extensive changes in the pattern of methylation at p1\*  
236 TIRA. In the 5'TIRA of these plants, only 15% of cytosines were methylated, suggesting  
237 that the methylation established in this region due to the activity of *Muk* was largely lost  
238 in a manner similar to what is observed at non-autonomous elements when exposed to the  
239 transposase. In contrast, within 3'TIRA 34% of the cytosines remained methylated in  
240 this region, somewhat less than the 48% methylation observed in 3'TIRA in siblings that  
241 carried only p1\* and F1 *MuDR;Muk* parent in the previous generation (44%) ( $P = 0.0032$ ,  
242 Fisher's exact test).

243         Having established that an active element can reverse at least some of the  
244 methylation associated with *Muk*-induced silencing of p1, we wanted to determine  
245 whether or not this has a heritable effect on the silenced element. In order to do this, a  
246 plant carrying p1\* by itself and a sibling carrying both p1\* and p5 were test crossed to a  
247 plant that lacked both *MuDR* and *Muk*, referred to as an *a1-mum2* tester (Figure 4A).  
248 When crossed to the *a1-mum2* tester, the plant carrying only p1\* gave rise to an ear all of  
249 whose kernels were uniformly pale. The plant carrying both p5 and p1\* yielded an ear  
250 that segregated for a single active element (44 spotted to 41 pale kernels), suggesting that  
251 p5 had not been silenced by p1\*, and p1\* had not been heritably activated as a  
252 consequence of exposure to p5. Analysis of methylation of TIRA in a progeny plant that  
253 carried only p1\* but that had been exposed to p5 in the previous generation (p1\*/- F2 in  
254 Figure 4A) revealed that exposure to p5 had no obvious heritable effect on the silenced  
255 element. 70% of the cytosines in 5'TIRA were methylated, as were 50% of the cytosines  
256 in 3'TIRA (Figure 4C). Further, when this plant was test crossed, none (0/137) of its  
257 progeny kernels were spotted.

258 In order to extend this observation, we performed a cross between a plant carrying  
259 a previously silenced p1 element (p1\*) by a plant that carried an active *MuDR* element at  
260 a third position, p4 (SINGH *et al.* 2008). The resulting ear segregated for a single active  
261 *MuDR* element (52% spotted progeny kernels). Spotted and pale progeny kernels were  
262 genotyped for p1 and p4 and then test crossed to plants that lacked either element. Of the  
263 plants grown from spotted progeny kernels, six of fourteen carried p1\* and all of them  
264 contained p4. When test crossed, these fourteen plants gave rise to an average of 52%  
265 spotted progeny (Supplemental Table 1), consistent with the segregation of a single  
266 active element. Siblings grown from spotted kernels that lacked p1\* gave rise to an  
267 average of 50% spotted progeny. Of the pale progeny, eight of seventeen carried p1\*.  
268 When test crossed, none of these gave rise to any spotted progeny. From these  
269 experiments, we conclude that the presence of the transposase from the active element  
270 had no heritable effect on the silenced element, nor did the silenced elements affect the  
271 active element.

272

273 **22 nt *mudrA*-specific small RNAs are associated with silencing of *MuDR* by *Muk*.**

274 Previously, we had demonstrated that small RNAs are associated with silencing of *MuDR*  
275 by *Muk* (SLOTKIN *et al.* 2005). This conclusion was based on gel hybridization of RNAs  
276 from young juvenile leaves. In order to more comprehensively characterize these small  
277 RNAs, small RNAs were sequenced from plants lacking both *Muk* and *MuDR*, plants  
278 carrying a single active *MuDR* element, plants carrying only *Muk*, and plants carrying  
279 both *MuDR* and *Muk* (F1 plants). In each of these cases, tissue was collected from young  
280 leaf 2. Leaf 2 was chosen because it is the tissue that had previously shown ample

281 evidence of an accumulation of *Muk*-specific small RNAs, and because TIRA is heavily  
282 methylated in all three sequence contexts in F1 plants in this leaf (LI *et al.* 2010).  
283 Further, in contrast to immature ears, this leaf also lacks the ubiquitous *MuDR*-  
284 homologous heterochromatic small interfering RNAs (hc-siRNAs) present in all  
285 genotypes regardless of activity present in that tissue (WOODHOUSE *et al.* 2006). Small  
286 RNAs of leaf 6 from F1 plants were also analyzed because previous work in our  
287 laboratory had demonstrated that this leaf exhibits a striking loss of TIRA methylation,  
288 concomitant with a loss of expression of *LBL1*, an important component of the tasiRNA  
289 silencing pathway in maize (LI *et al.* 2010; DOTTO *et al.* 2014).

290 Consistent with previous results, plants with *Muk* by itself contained large  
291 numbers of *MuDR*-identical small RNAs, the vast majority of which were 21 and  
292 (particularly) 22 nucleotides in length (Figure 5 and Supplementary Table 2). These  
293 small RNAs were oriented in both sense and antisense orientation relative to *mudrA*, and  
294 were restricted to the portion of the *Muk* transcript that can form an inverted repeat,  
295 consistent with the hypothesis that the small RNAs are a product of processing and/or  
296 amplification of the hairpin transcript produced by *Muk*. In contrast, plants carrying only  
297 *MuDR* and those that lacked both *MuDR* and *Muk* had very few *MuDR*-identical small  
298 RNAs.

299 The presence of a deletion within *Muk* relative to *MuDR* resulted in a junction that  
300 is unique to *Muk*. We found one prominent group of 22 nt small RNAs that spanned this  
301 junction and thus can only be derived from *Muk* (Figure S2). Interestingly, this particular  
302 class of unique, *Muk*-specific small RNAs are largely in the sense orientation relative to

303 the *mudrA* transcript, suggesting that processing of the *Muk* hairpin transcript at this site  
304 favors retention of small RNAs in this orientation.

305 The small RNAs sequenced from plants carrying both *MuDR* and *Muk* are quite  
306 similar to those observed in plants carrying only *Muk*, with one important exception. In  
307 these plants there are many 21 and 22 nt small RNAs corresponding to regions of *MuDR*  
308 that are not present in *Muk* (Figure 5A). Although these small RNAs are in both  
309 orientations relative to *mudrA*, a prominent cluster, mapping approximately 1880 nt from  
310 the 5' end of *MuDR* is primarily in the antisense orientation (Figure 5A, arrow).

311 Given that these *mudrA*-specific small RNAs are only present when both *MuDR*  
312 and *Muk* are combined, these data suggest a transitive process by which *mudrA* transcript  
313 is converted into double-stranded RNA and then cleaved into 21 and 22 nt small RNAs,  
314 presumably triggered by the presence of small RNAs generated by *Muk*. Interestingly, the  
315 ratio of 22 nt to 21 nt small RNAs differs between the regions shared by both *MuDR* and  
316 *Muk* and the regions only present in *MuDR*. In the former, the ratio of 22 nt to 21 nt small  
317 RNAs is 5.1:1. In the latter it is 1.4:1 ( $P < 0.0001$ ,  $\chi^2$  test) (Supplemental Table 3).

318 Given that these distinct size classes require distinct DCL proteins, generally DCL4 for  
319 21 nt *trans*-acting small RNAs and DCL2 for the 22 nt size class (SCHWAB and VOINET  
320 2010), this observation suggests the relative contribution of these two proteins may differ  
321 in these two distinct regions.

322 Interestingly, the vast majority of small *MuDR*-identical small RNAs in plants  
323 that carry only *Muk* or that carry both *MuDR* and *Muk* correspond to transcribed *mudrA*  
324 sequences. This is most apparent at the transcriptional start site of *mudrA*, where there is  
325 a prominent cluster of 22 nt small RNAs, most of which are in an antisense orientation



326 relative to *mudrA* (Figure 5B). There are also a smaller number of small RNAs  
327 corresponding to sequences upstream of the start of transcription within TIRA. However,  
328 many of them are sizes other than 22 nt. Further, when two mismatches are permitted,  
329 roughly half of them have sequences that match a non-autonomous *Mu* element present  
330 elsewhere in the maize reference genome rather than *MuDR* (Figure S3) (TAN *et al.*  
331 2011).

332 The distribution of these two distinct small RNA populations in all of the plants  
333 carrying *Muk* matches the distribution of DNA methylation within TIRA of both *d107*  
334 and silenced *MuDR* elements. The variably sized and polymorphic small RNAs  
335 correspond to the 5' end of TIRA that is default methylated in all sequence contexts in  
336 the absence of the transposase in *d107* (Figure 3). The more numerous 22 nt small RNAs  
337 correspond to the expressed portion of TIRA whose stable CG and CHG methylation is  
338 triggered in response to *Muk* (Figures 3 and 4). Interestingly, analysis of large  
339 populations of small RNAs from *mop1* mutant and wild type immature ears, as well as  
340 *lhl1* mutant and wild type leaf apices provides similar evidence (Supplemental Table 4).  
341 In these libraries, derived from plants that did not carry *MuDR* or *Muk*, there are very few  
342 small RNAs of any size class perfectly matching either 5'TIRA or 3'TIRA. When two  
343 mismatches are permitted, there are a substantial number of small RNAs matching TIRA,  
344 but the vast majority of them are in 5'TIRA. In combination with our analysis, these data  
345 suggest that *de novo* methylation of 5'TIRA, but not 3'TIRA, is mediated by  
346 “background” small RNAs with one or more mismatch, but *de novo* methylation of  
347 3'TIRA requires 21 and 22 nt small RNAs derived from the *Muk* hairpin and processed  
348 Pol II *mudrA* transcript.

349           Given the involvement of *LBL1* in the production of dsRNA, and the requirement  
350 for *LBL1* in methylation of TIRA in leaf tissue, we hypothesized that there would be a  
351 reduction of small RNAs in leaves that are transitional between juvenile and adult, which  
352 exhibit a loss of both TIRA methylation and a reduction of *Lbl1* expression (Li *et al.*  
353 2010). In fact we observed a dramatic reduction in the number of small RNAs of all size  
354 classes in transition leaves (Figure 5C and Supplemental Table 2).

355

356 **TIRB silencing is not associated with small RNAs.**

357           *Muk* does not include sequences from *mudrB*. However, it does include TIRA,  
358 which is 99% identical over the first 180 bp with TIRB, suggesting that small RNAs from  
359 the *Muk* hairpin transcript would be hypothetically competent to direct methylation of  
360 TIRB. Although *mudrB* is eventually silenced by *Muk*, the trajectory of *mudrB* silencing  
361 is distinct. Unlike *mudrA*, which is transcriptionally silenced by the immature ear stage in  
362 *p1;Muk* F1 plants, *mudrB* is not transcriptionally silenced by this stage (SLOTKIN *et al.*  
363 2003). Instead, in these plants transcript from *mudrB* is readily detectable, but it does not  
364 appear to be polyadenylated. By the next generation, however, plants that carry only *p1\**  
365 do not have detectable *mudrB* transcript. Further, *Muk* can only heritably silence *mudrB*  
366 in this way when this gene is in *cis* to *mudrA* (on the same transposon); it is not silenced  
367 when it is in *trans* to a *mudrA* gene that is being silenced (SLOTKIN *et al.* 2005).

368           Previous work using RNA gel hybridization showed that small RNAs similar to  
369 *mudrB* did not accumulate to high levels in F1 *MuDR;Muk* plants (SLOTKIN *et al.* 2005).  
370 In some ways, this was surprising given that TIRB is identical over much of its length to  
371 TIRA, and the hairpin formed by the *Muk* transcript includes all of TIRA (and thus TIRB

372 as well). A closer examination of the small RNA population in F1 leaf 2 tissues provides  
373 a possible explanation for this discrepancy. Although the two TIRs are quite similar to  
374 each other, they are more diverged near the internal portion of each TIR, within 3'TIRA  
375 and 3'TIRB (Figure 6C). The *mudrA* transcript initiates 168 bp from the end of the  
376 element and the *mudrB* transcript initiates 163 bp from the other end of the element  
377 (HERSHBERGER *et al.* 1995). Since this is the region in which TIRA and TIRB begin to  
378 diverge in sequence, there are very few 22 nt small RNAs that perfectly match TIRB,  
379 particularly in the transcribed portion of TIRB (Figure 6A and B). If silencing requires  
380 the presence of both the target transcript and small RNAs from the *Muk* hairpin, this  
381 distribution of small RNAs may explain why *Muk* acts only indirectly on *mudrB* via a  
382 distinct mechanism.

383

## 384 **Discussion**

385 The evidence presented here suggests that two distinct silencing pathways operate  
386 on *MuDR* TIRA as it is being silenced. One pathway, dependent on MOP1, appears to  
387 involve a number of heterogeneous small RNAs likely derived from other *Mu* TIRs in the  
388 genome that target 5'TIRA for DNA methylation in the absence of the transposase. They  
389 do not, however, trigger transcriptional silencing, as is evidenced by *d107*, which  
390 accumulates dense methylation in 5'TIRA but is transcriptionally active. In contrast,  
391 when *d107* or *MuDR* is silenced by *Muk*, methylation spreads from 5'TIRA into the  
392 transcribed portion of the *mudrA* (Figure 3 and (LI *et al.* 2010)). Once *MuDR(p1)* is  
393 silenced, a source of transposase can reverse the methylation at 5'TIRA but does not  
394 reverse the heritably silenced state of *MuDR(p1)*, nor does it reverse methylation within

395 3'TIRA (Figure 4). Thus, one can gain methylation at 5'TIRA and not gain  
396 transcriptional silencing, and one can lose 5'TIRA methylation and not lose heritable  
397 transcriptional silencing. Interestingly, these data also suggest that the methylation  
398 required for a heritably silenced state is restricted to the 3'TIRA, and is largely composed  
399 of CG and CHG methylation (Figure 4).

400 The second pathway involves 21 and 22 nt small RNAs specifically associated  
401 with sequences within 3'TIRA corresponding to the transcribed portion of *mudrA*. These  
402 small RNAs correspond to cytosines within 3'TIRA that are stably methylated in the CG  
403 and CHG sequence contexts, and are only observed in leaves carrying *Muk*, either by  
404 itself or in combination with *MuDR*. Plants carrying both *MuDR* and *Muk* also have many  
405 small RNAs that are derived from portions of *mudrA* that are not present in *Muk*. This is  
406 consistent with the activity of a transitive process that is triggered by small RNAs  
407 processed from the *Muk* hairpin. This hypothesis is supported by the observation that in  
408 leaf 6 in which *lbl1* expression is reduced, the number of these small RNAs is also  
409 reduced (Figure 5, Table S1) (LI *et al.* 2010). The fact that the 22 nt small RNAs do not  
410 extend upstream of the transcriptional start site of *mudrA* suggests that these small RNAs  
411 are processed almost entirely from transcript initiated from within TIRA rather than the  
412 double-stranded hairpin formed by *Muk*, which includes 5'TIRA. Since *LBL1* works in  
413 conjunction with *RDR6* to produce a variety of *trans*-acting small RNAs, these data  
414 suggest that the *Muk* triggers silencing in leaves via a pathway that interacts with Pol II  
415 TE transcripts in a manner that is similar to that described in *Arabidopsis* (WU *et al.* 2012;  
416 NUTHIKATTU *et al.* 2013; PANDA and SLOTKIN 2013; PANDA *et al.* 2016). In this context,  
417 an interaction between small RNAs and Pol II transcript represents a natural and expected

418 means by which otherwise active TEs are recognized and silenced. The key here is the  
419 source of small RNAs that can trigger silencing. For high copy number elements, a low  
420 level of expression of aberrant transcripts in germinal lineages could be sufficient to  
421 trigger silencing of transiently active elements. For low copy number elements such as  
422 *Mu* or *Ac*, it may be necessary for rearrangements to arise prior to effective silencing.  
423 Interestingly, however, maize lines containing larger numbers of *Mu* elements are prone  
424 to spontaneous silencing (ROBERTSON 1986; SKIBBE *et al.* 2012). This phenomena  
425 appears to be a function of copy number, as single copy number *MuDR* line, which was  
426 derived from such a line does not show evidence of spontaneous silencing, and if copy  
427 number is allowed to increase in this line spontaneous silencing begins to occur (D.  
428 Lisch, unpublished). We speculate that this spontaneous silencing could be due to the  
429 accumulation of aberrant *MuDR* elements that collectively trigger silencing of active  
430 elements in this line.

431         One important conclusion from our analysis is that default methylation such as  
432 that observed at *d107* and *Mu1* is not sufficient to trigger silencing. *d107* expresses a  
433 transcript and *Mu1* element has a functional outward reading promoter even when it is  
434 methylated (BARKAN and MARTIENSSEN 1991). Because hypomethylated *Mu1* elements  
435 can be re-methylated due to genetic segregation of *MuDR*, or even in somatic sectors in  
436 which the transposase is lost, it is apparent that this pathway is competent to trigger *de*  
437 *novo* methylation during plant development (LISCH *et al.* 1995; LISCH and JIANG 2008).  
438 However, this methylation is readily reversed when transposase is reintroduced. This may  
439 be because binding of the transposase to the TIR directly blocks methyltransferase  
440 activity or due to demethylation activity on the part of the transposase as has been

441 proposed for the *Spm* transposase (CUI and FEDOROFF 2002). These results are  
442 reminiscent of patterns of methylation in other transposable elements. For instance,  
443 although active maize *Spm* elements are extensively methylated throughout much of the  
444 element, they are hypomethylated in the region immediately upstream of their  
445 transcriptional start site. In contrast, silenced *Spm* elements are extensively methylated in  
446 this region (BANKS *et al.* 1988). Further, when silenced *Spm* elements are exposed to  
447 active *Spm* elements, an adjacent region in the active element can be demethylated (CUI  
448 and FEDOROFF 2002). Methylation within the *Tam3* transposon in *Antirrhinum majus* is  
449 reversible and the loss of methylation requires the presence of the transposase, suggesting  
450 that methylation of this TE may be a consequence of the loss of transposase rather than a  
451 cause of silencing (HASHIDA *et al.* 2006). Our data is consistent with that hypothesis, at  
452 least with respect to methylation within TIRA.

453         The default methylation at 5'TIRA is dependent on the maize homolog of RDR2,  
454 MOP1, which is required for the vast majority of 24 nt heterochromatic siRNAs (hc-  
455 siRNAs) (LISCH *et al.* 2002; ALLEMAN *et al.* 2006; NOBUTA *et al.* 2008). Previous work  
456 in our laboratory has demonstrated that heritable silencing of *MuDR* by *Muk* occurs  
457 efficiently in a *mop1* mutant background in the absence of those hc-siRNAs, and that  
458 *Muk*-specific small RNAs are retained in this mutant (WOODHOUSE *et al.* 2006). Further,  
459 in immature ears, the presence of the hc-siRNAs, likely derived from *hMuDR* elements in  
460 this genetic background, has no effect on an otherwise active *MuDR* element. Thus, it  
461 would appear that *de novo* silencing of *MuDR* elements requires small RNAs derived  
462 from Pol II transcript, but likely not those derived from processed Pol IV transcripts.  
463 This would explain why silenced *MuDR* elements do not silence active elements, as the

464 silenced elements would be expected to produce only Pol IV transcript, which would not  
465 be expected to produce *trans*-acting small RNAs. More generally, it suggests that the  
466 presence of previously silenced elements, by itself, is not sufficient to initiate silencing.  
467 Indeed, this has been demonstrated for reactivated elements in *Arabidopsis* (KATO *et al.*  
468 2004). This in turn suggests that transient loss of silencing of previously silenced *MuDR*  
469 elements, such as has been observed in pollen (SLOTKIN *et al.* 2009) would only be  
470 expected to function to reinforce silencing if those previously silenced elements produced  
471 aberrant Pol II transcripts with a propensity to be processed into *trans*-acting small  
472 RNAs. This seems to be the case for easiRNAs in *Arabidopsis*, which are produced from  
473 aberrant hairpin micro-RNA-like transcripts that target transposons (CREASEY *et al.*  
474 2014). Thus, we suggest that the key to silencing reinforcement in tissues such as pollen  
475 is not reactivation of silenced elements *per se*, but reactivation of “zombie” elements,  
476 whose Pol II transcripts, when expressed, are competent to reinforce or trigger silencing  
477 in *trans*. These elements could be similar in structure of *Muk* and result in the production  
478 of a hairpin, but any feature of their transcript that is recognized as aberrant that would be  
479 sufficient. In our low copy *Mutator* line, it would appear that these zombie elements are  
480 not present. Thus, pollen that carries both a silenced *MuDR* element and an active  
481 element does not give rise to progeny in which the active element has been silenced,  
482 despite evidence that silenced *MuDR* elements, like other silenced transposons, are  
483 transcriptionally activated in the pollen vegetative nucleus as part of a strategy of  
484 silencing reinforcement (SLOTKIN *et al.* 2009; MARTINEZ *et al.* 2016).

485         Our observations are consistent with a relatively simple model (Figure 7). TIRA  
486 methylation is absent whenever a functional transposase is present, presumably because

487 the transposase blocks methyltransferase activity. When 22 nt small RNAs are  
488 introduced from the *Muk* hairpin, they trigger RDR6-dependent production of double-  
489 stranded RNA using the Pol II-derived *mudrA* transcript as a template. This double-  
490 stranded RNA is cleaved by a DICER (presumably DCL2 and/or DCL4) and the resulting  
491 small RNAs are then used to direct DNA methylation, largely in the CG and CHG  
492 sequence contexts in 3'TIRA. Meanwhile, because the transposase is no longer present,  
493 hc-siRNAs derived from other silenced *Mu* elements present in the genome can direct *de*  
494 *novo* methylation of 5'TIRA, exactly as they do at *d107* and *Mu1* in the absence of  
495 functional transposase (Figures 2 and 3). According to this model, processed *mudrA*  
496 transcript and the resulting 3'TIRA methylation is the cause of transcriptional silencing,  
497 and 5'TIRA methylation is a consequence of that silencing. Based on this model, we  
498 would predict that a *MuDR* derivative that had a genetic lesion that prevented it from  
499 expressing Pol II transcript would accumulate methylation in 5'TIRA but would not  
500 accumulate methylation in 3'TIRA when combined with *Muk*.

501       The involvement of two parallel pathways interacting with *MuDR* TIRA raises  
502 some interesting questions. The default methylation pathway suggests that there are small  
503 RNAs that are competent to trigger *de novo* methylation that are present even when the  
504 elements are active. However, active *MuDR* elements retain that activity in the face of  
505 this “soup” of hc-siRNAs, and the same is true for some other active transposons, such as  
506 CACTA elements in *Arabidopsis* and *Mu* elements in maize (KATO *et al.* 2004;  
507 WOODHOUSE *et al.* 2006). In contrast, others, such as ONSEN and *Tos17*, are rapidly re-  
508 silenced after periods of activity, a process that requires Pol IV (HIROCHIKA *et al.* 1996;  
509 ITO *et al.* 2011; MATSUNAGA *et al.* 2015). Since Pol IV transcript is thought to be



510 derived from previously methylated elements, this would suggest that at some threshold,  
511 silenced elements can contribute to *de novo* silencing of active elements. In contrast, *Muk*  
512 silencing of *MuDR* does not appear to involve 24nt Pol IV-dependent small RNAs,  
513 presumably because processing of the *Muk* hairpin can produce siRNAs in the absence of  
514 hc-siRNAs (WOODHOUSE *et al.* 2006). Further, those hc-siRNAs that are present in the  
515 background largely target a portion of active *MuDR* elements (5'TIRA) that is irrelevant  
516 to transcriptional gene silencing (Figure S3). This may be due to random sequence  
517 divergence within the relevant portions of TIRA relative to other *Mu* elements, or due to  
518 selection in favor of differences between autonomous and non-autonomous elements at  
519 the *mudrA* and *mudrB* transcriptional start sites. Indeed, we find few hc-siRNAs  
520 specifically targeting the transcribed portion of TIRA. Further, a more comprehensive  
521 analysis of all available small RNAs derived from a number of tissues and genetic  
522 backgrounds reveals that the vast majority of small RNAs with zero, one or two  
523 mismatches to *MuDR* map to 5'TIR rather than 3'TIR (Supplemental Table 4). The  
524 absence of small RNAs directly targeting the transcribed portions of *mudrA* and *mudrB*,  
525 despite the presence of *hMuDRs* suggests that selection may have favored sequence  
526 divergence between currently active and previously silenced autonomous elements  
527 (*hMuDRs*).

528         Collectively, our data suggests that active elements in maize remain active  
529 because of an absence of small RNAs that are competent to trigger heritable silencing,  
530 and that small RNAs competent to trigger silencing are most likely those that directly  
531 target the Pol II transcript arising from those active elements, rather than the small RNAs  
532 derived from previously silenced elements. Further, our data suggest that heritable

533 silencing information is contained within 3'TIRA in the form of CG and CHG  
534 methylation. Finally, our analysis of small RNAs in transition leaves reveals that the loss  
535 of *LBL1* in these leaves results in a reduction of small RNAs targeting *mudrA*, suggesting  
536 that the accumulation of these small RNAs are dependent on the tasiRNA pathway.

537

538 Author contributions: D.B performed the bisulfite analysis and contributed to  
539 experimental design. H.L performed the small RNA sequencing analysis contributed to  
540 experimental design. S.K. performed bisulfite analysis on the *MuDR* active individual.  
541 M.Z. performed analysis of the small RNA data set. D.L wrote the manuscript, performed  
542 the genetic analysis and analyzed the small RNA and deletion junction analysis.

543

544 Acknowledgements: This work was supported by the National Science Foundation  
545 (Grants DBI-1237931 and DBI-0820828 to D.L.) as well as the Purdue Center for Plant  
546 Biology. We thank Xinyan Zhang and Thomas Peterson for providing useful comments.

547

## 548 **Materials and Methods**

549 **Plant materials.** The minimal *Mutator* line consists of one fully active *MuDR* element at  
550 position 1 (p1) on chromosome 3L (CHOMET *et al.* 1991). *Muk* is a derivative version of  
551 *MuDR* as described previously (SLOTKIN *et al.* 2005). Activity is monitored in seeds via  
552 excisions of a non-autonomous *Mu1* element inserted into the *a1-mum2* allele of the *A1*  
553 color gene (CHOMET *et al.* 1991). All plants used in these experiments are homozygous  
554 for *a1-mum2*. “Test crosses” refer to crosses to plants that are homozygous for *a1-mum2*  
555 but that lack *MuDR* or *Muk*.

556           The crosses used to generate the genotypes examined are depicted in Figures 3A  
557 and 4A. In order to construct lines containing silenced *MuDR(p1)* elements (p1\*) with  
558 and without active elements, plants carrying p1 were crossed to plants heterozygous for  
559 *Muk*. Progeny plants that were heterozygous for *Muk* and that carried p1 were then  
560 crossed to plants that carried *MuDR(p5)* (p5). Progeny that lacked *Muk* and that carried  
561 silenced p1 (p1\*) with or without p5 were then compared. Plants carrying p1\* and p5  
562 were then test crossed to *a1-mum2* testers, and progeny plants carrying only p1\* were  
563 examined. Tests of the ability of a second active element, p4, to activate a silenced  
564 element were performed by crossing a plant carrying p4 to a plant carrying a previously  
565 silenced p1\* element and then test crossing plants carrying both p1\* and p4. Progeny of  
566 this cross were then separated into spotted (exhibiting somatic excisions of the reporter  
567 element) and pale kernels, genotyped for p1 and p4 and then test crossed. Genotyping for  
568 p1 employed primers RL TIR2 and Ex1. Genotyping for p4 employed primers RL TIR2  
569 and p4flankB. Genotyping for p5 employed primers RL TIR2 and p5flankB (all primers  
570 used in experiments described in this manuscript are supplied in Supplemental Table 5).

571 **Tissue sampling.** All plants used in bisulfite sequencing experiments were genotyped  
572 individually. Immature ears, approximately 10 cm long, were collected from each  
573 individual plant. To check for variation in patterns of methylation, fully mature leaves  
574 (the third leaf from the top of each plant) were also examined (Figure S5). Given that the  
575 results were nearly identical for ears and leaves, only the data from ears is presented here.  
576 For small RNA analysis, the distal 10 cm of emerging leaves was collected as previously  
577 described (LI *et al.* 2010).

578 **Genomic Bisulfite sequencing.** Genomic DNA was isolated as previously described  
579 (LISCH *et al.* 1995). Two micrograms of genomic DNA from the appropriate genotype  
580 were digested with restriction enzymes (*XhoI* and *BamHI*) that cut just outside of the  
581 region of interest. Bisulfite conversion was performed using an EpiTect Bisulfite kit  
582 (Qiagen). PCR fragments from TIRA were amplified using p1bis2f and TIRAbis2R, and  
583 re-amplified using TIRAbis2R and the nested primer TIRAmF6 or p1bis7Fmed (all  
584 primer sequences are provided in Supplemental Table 5). In addition, all samples were  
585 also amplified using a different set of primers (TIRAMF6 and Autr1R, followed by re-  
586 amplification with Autr1R and the nested primers TIRAF1 or p1bis7Fmed). The  
587 sequences from each amplification were then compared. This was done to ensure that  
588 biases had not been introduced due to the selection of a particular pair of primers. No  
589 substantive differences were detected and thus clones from each set of primers were  
590 combined. In addition, for many of the plants examined, both fully mature leaves (the  
591 third from the top leaf) and immature ears were examined. The results in all cases  
592 (different primers or different tissues) were substantially equivalent. An example of  
593 results obtained using two sets of primers on both leaves and immature ears from one  
594 plant is portrayed in Figure S4. To ensure that duplicate clones resulting from  
595 amplification did not skew the analysis, sequences with zero mismatches were only  
596 counted once for each sample. The resulting sequences were analyzed using kismeth  
597 (<http://katahdin.mssm.edu/kismeth/revpage.pl>) (GRUNTMAN *et al.* 2008).

598 For *MuI* methylation analysis, a similar strategy was employed, but the initial use  
599 of restriction enzymes was not necessary. Following bisulfite conversion, the DNA was

600 amplified using primers Mu1bis1 (located in the *MuI* element) and either a1mum2bis1 or  
601 a1mum2bis2 (located in the *a1-mum2* allele, flanking the *MuI* insertion).

### 602 **Small RNA sequencing.**

603 Plants were grown in a greenhouse with a 12 hour light cycle. Young leaf tissue for small  
604 RNA samples was obtained from two closely related families segregating for *MuDR* and  
605 *Muk*. Each sample class contained at least three pooled individuals, each one of which  
606 was genotyped. RNA was independently extracted from two separate sets of individuals  
607 on different days, and each set is referred to as an experimental replicate, the results of  
608 which are presented separately because of large overall differences in relative abundance  
609 of normalized *MuDR*-identical small RNAs. The classes included *MuDR* by itself, *Muk*  
610 by itself, *MuDR* with *Muk*, and neither *MuDR* nor *Muk*. The small RNA extraction and  
611 enrichment protocol was adapted from Dalmay et. al. (DALMAY *et al.* 2000). Total RNA  
612 was extracted using an SDS-based extraction solution and precipitated using ethanol. The  
613 pellet was dissolved in water, heated to 65°C for 5 min, and then placed on ice.  
614 Polyethylene glycol (molecular weight 8000; Sigma) was added to a final concentration  
615 of 5% and NaCl to a final concentration of 0.5 M. After an hour incubation on ice, the  
616 RNA was centrifuged at 10,000g for 10 min. Three volumes of ethanol were added to the  
617 supernatant, and the RNA was precipitated at -20°C for at least 2 hrs. The low molecular  
618 weight RNAs were pelleted by centrifugation for 10 min at 10,000g. Small RNAs were  
619 detected in Polyacrylamide gel electrophoresis (PAGE) gel and purified by ZR small-  
620 RNA™ PAGE Recovery Kit. Small RNA library was prepared by ScriptMiner™ Small  
621 RNA-Seq Library Preparation Kit for Illumina sequencing.

622

623 **Small RNA data analysis.**

624 The small RNA sequencing data from different libraries was trimmed and filtered for low  
625 quality reads, adapter sequences, and reads matching structural noncoding RNAs  
626 (t/r/sn/snoRNAs) collected from Rfam (<http://rfam.sanger.ac.uk>). The kept reads with a  
627 length of 18-26 nt were mapped to *MuDR(p1)* and *Muk*, and their flanking 500 bp  
628 upstream and downstream sequences using Bowtie only allowing perfect matches  
629 (LANGMEAD *et al.* 2009). Small RNA abundance was normalized to reads per million.  
630 The data was viewed using Intergrative Genomics Viewer (Robinson *et al.* 2011). Small  
631 RNAs for the *mop1* and *lbl1* mutants were downloaded from previous studies (Nobuta *et*  
632 *al.*, 2008; Dotto *et al.*, 2014), trimmed and mapped to *MuDR* sequences.

633 **Statement on reagent and data availability**

634 All small RNA data generated for this work is freely and publicly available. The small  
635 RNA sequencing data have been deposited at the National Center for Biotechnology  
636 Information Gene Expression Omnibus under accession number GSE103833. Maize lines  
637 used for these analyses are also freely available for non-commercial purposes.

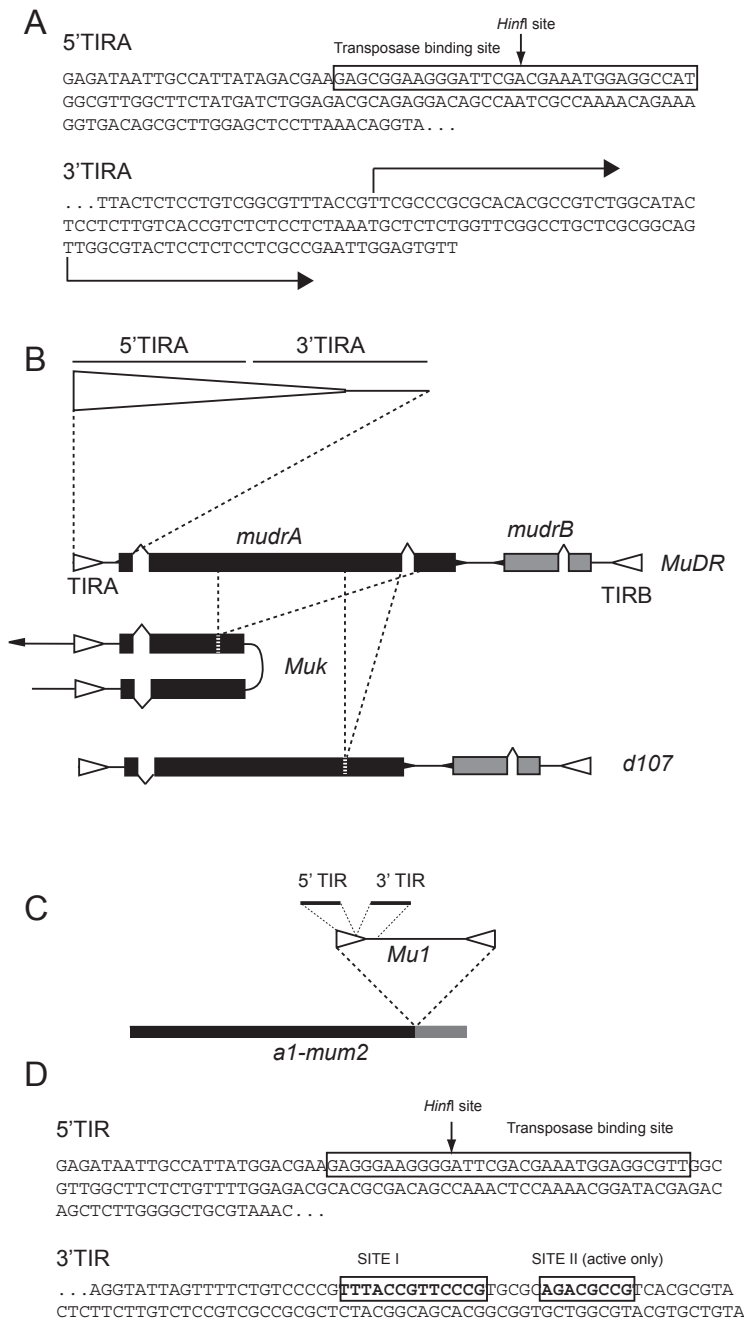

638

639 Figure 1. The structures of *Mu* elements examined. A) The DNA sequence of the  
640 terminal inverted repeat (TIR) adjacent to the *mudrA* gene in *MuDR* (TIRA). 5'TIRA  
641 refers to the first 144 bp of the TIR and includes the known binding site for the *MuDR*  
642 transposase. The *Hinfi* site has long been diagnostic for methylation in TIRs. The

643 adjacent 3'TIRA includes the last 75 bp of the TIR along with 56 bp of internal  
644 sequences corresponding to a portion of the *mudrA* 5' UTR, indicated by arrows. This  
645 region includes both of the alternative transcriptional start sites for *mudrA*. B) A diagram  
646 of the structure of *MuDR*, *Muk* and *d107*. TIRs are indicated as open triangles and exons  
647 as shaded boxes. The regions missing in *Muk* and *d107* are indicated by dashed lines. C)  
648 The structure of the *MuI* insertion at *a1-mum2*. D) The sequence of the *MuI* TIR,  
649 divided into its 5' and 3' parts. The transposase binding site is as indicated, as are  
650 additional protected sites within the 3' portion of the *MuI* TIR.

651

652

653



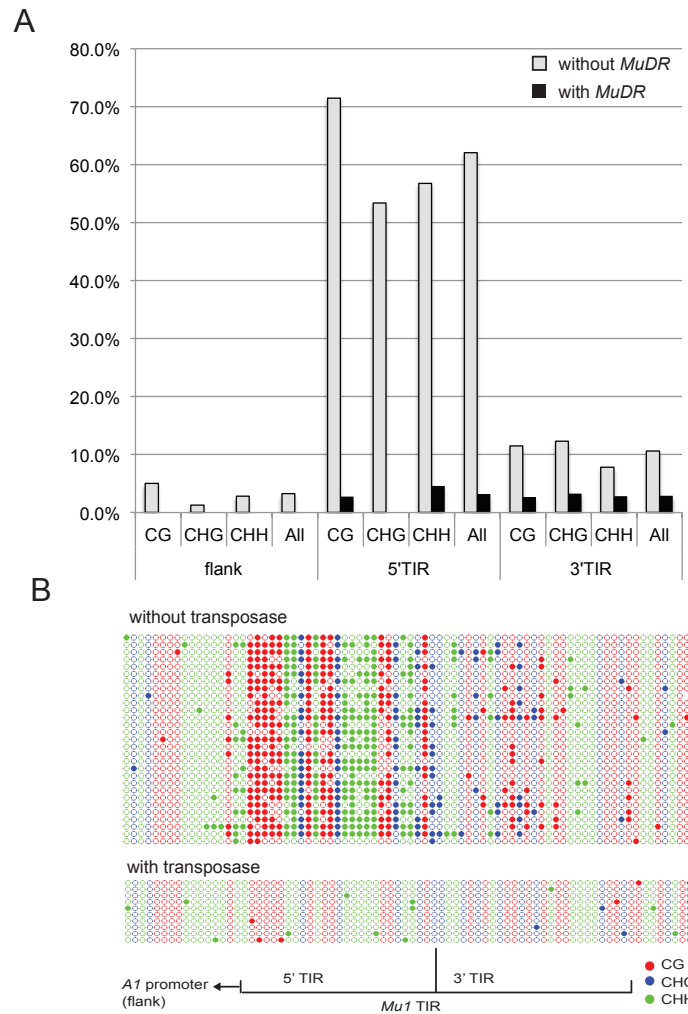

654

655 Figure 2. Methylation of the non-autonomous *Mu1* element in the presence and absence  
 656 of an active *MuDR* element. A) Percent methylated cytosines in sequences flanking the  
 657 *Mu1* insertion, as well as the 5' and 3' portions of the *Mu1* TIR. Cytosines are classified  
 658 by sequence context, with “H” meaning any nucleotide except guanine. B) A graphic  
 659 depiction of the same patterns of cytosine methylation. For this and all subsequent  
 660 depictions of cytosine methylation, filled circles indicate methylated cytosines in the CG  
 661 (red) CHG (blue) and CHH (green) sequence contexts. Open circles represent  
 662 unmethylated cytosines. Each line represents one clone from a PCR amplification of a  
 663 bisulfite-treated DNA sample.

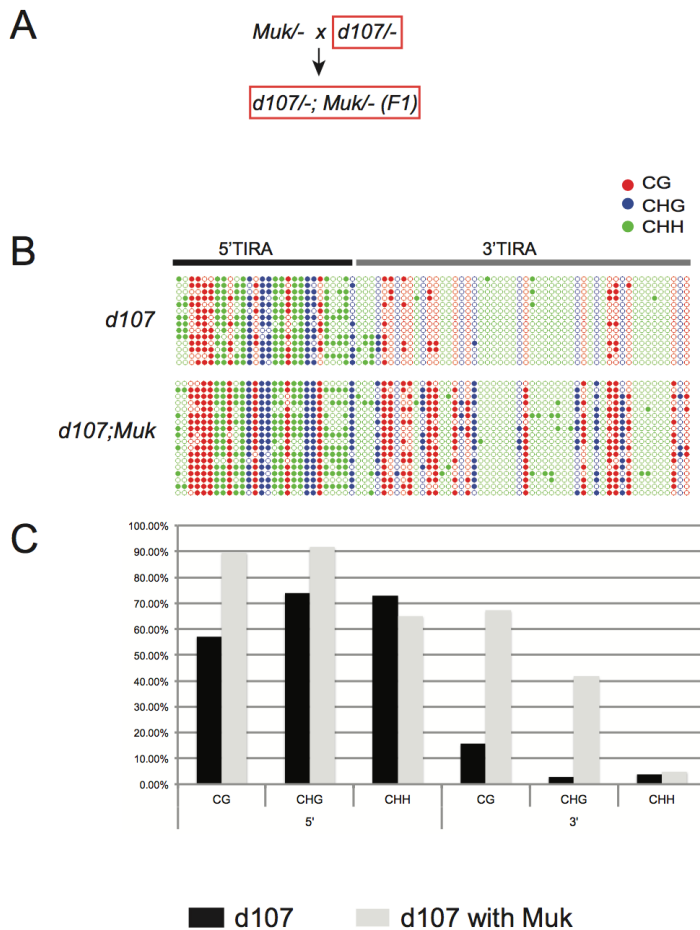

664

665 Figure 3. Depiction of patterns of methylation in TIRA of the deletion derivative, *d107*.

666 A) The cross used to generate the individuals examined (one of each genotype) (boxed

667 red) B) A graphic representation of the patterns of methylation at *d107* TIRA. Samples

668 include a transcriptionally active *d107* and *d107* in the presence of *Muk*. Cytosines in

669 different sequence contexts (CG, CHG and CHH) are as indicated. C) Percent

670 methylation of cytosines in each sequence context in the same samples depicted

671 graphically, with the results separated into 5'TIRA and 3'TIRA.

672

673

674

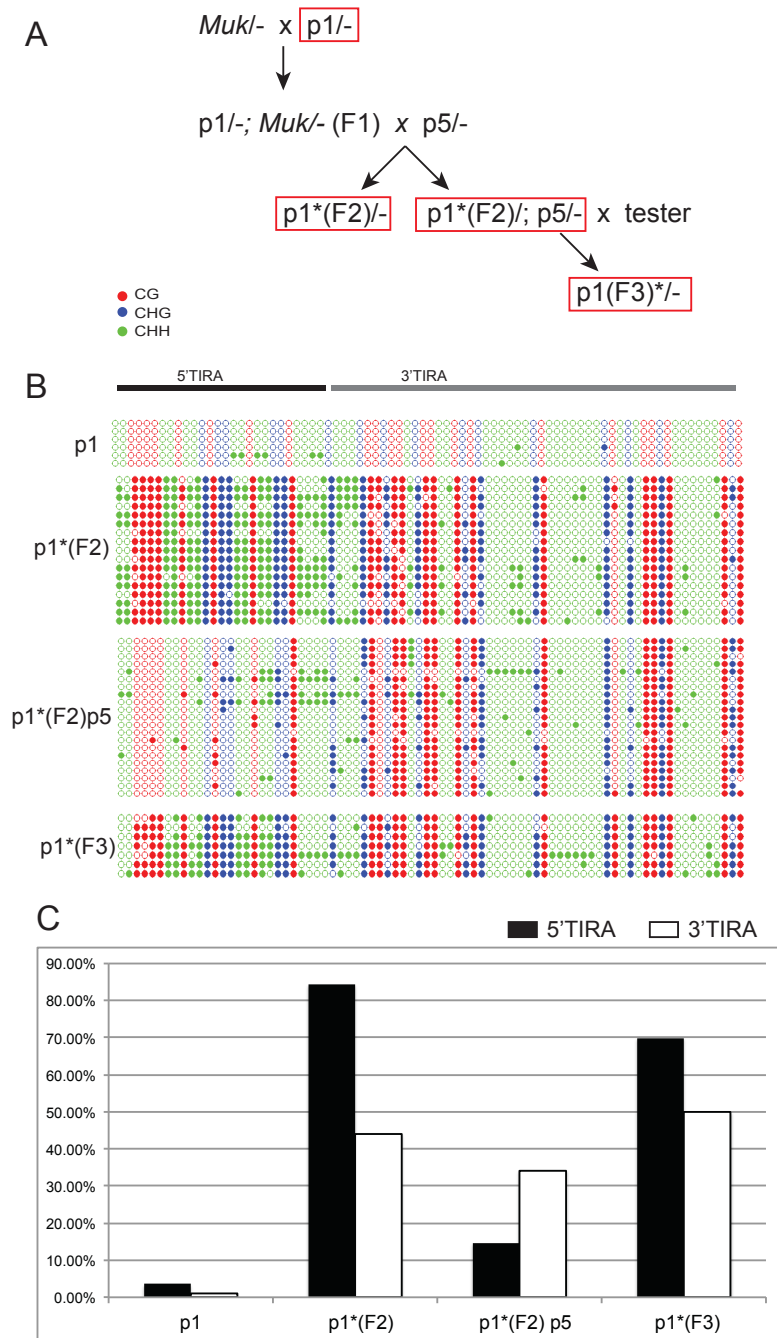

Figure 4

675

676 Figure 4. The effect of an active element on methylation of a silenced element. A) The

677 crosses used to generate the samples subject to bisulfite sequencing (boxed red) B) A

678 graphic representation of patterns of cytosine methylation within TIRA in plants of the  
679 indicated genotypes. Cytosines in different sequence contexts (CG, CHG and CHH) are  
680 as indicated. C) Percent methylation of cytosines within 5' TIRA and 3'TIRA in plants of  
681 the indicated genotype.  
682

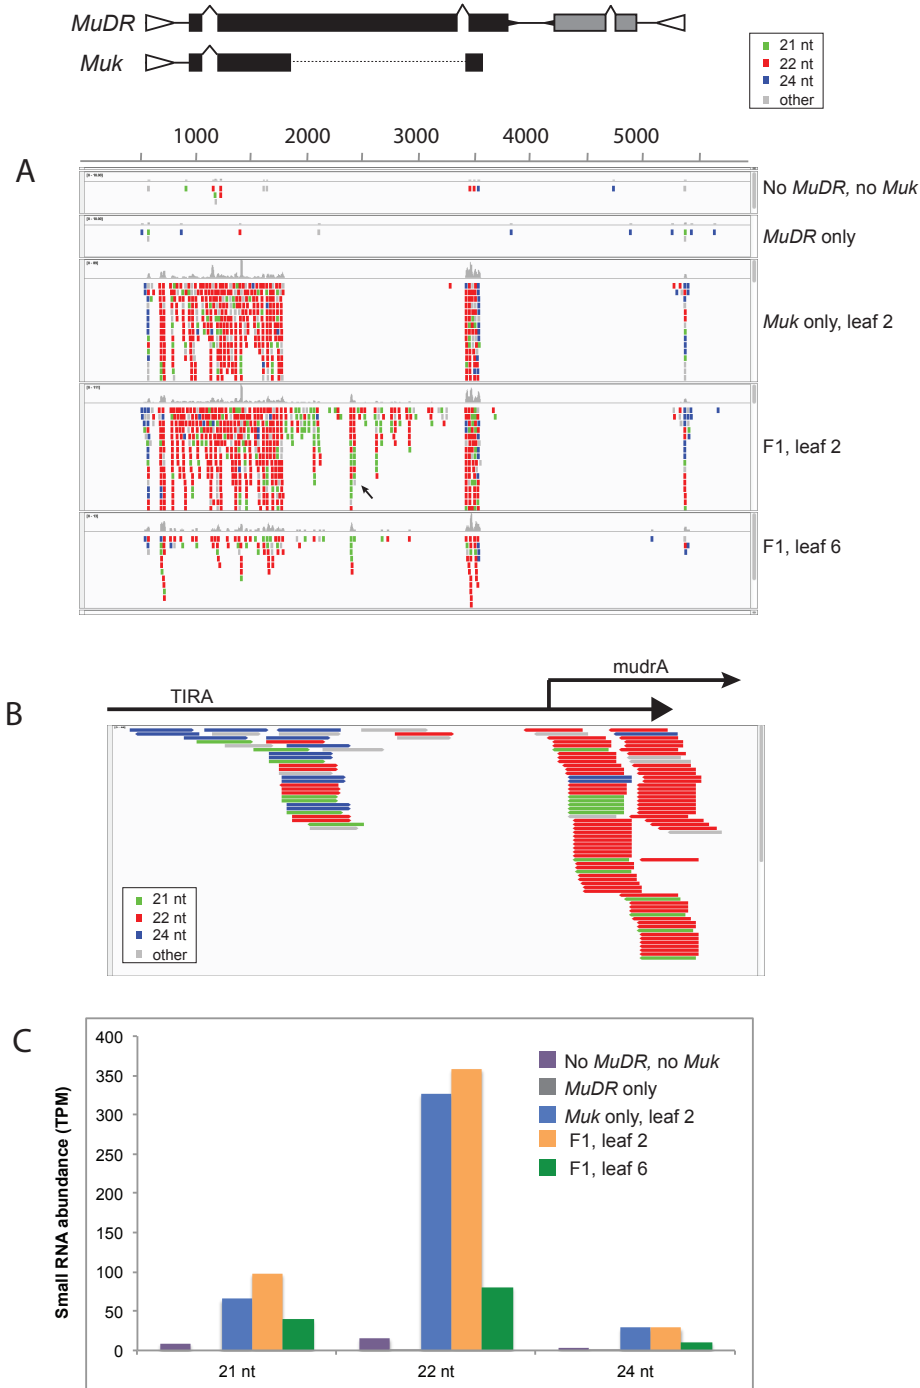

683

684 Figure 5. Small RNAs associated with silencing of *MuDR* by *Muk*. A) A representation of  
685 perfectly matched small RNAs from tissues of various genotypes mapped onto *MuDR*. A  
686 map of the regions present in *Muk* is provided for reference. Small RNAs are color coded  
687 for size, as indicated. Note that small RNA samples from plants containing only *MuDR* or

688 neither *MuDR* nor *Muk* have very few small RNAs matching *MuDR*. B) Small RNAs  
 689 with exact matches to the first 250 bp of *MuDR* (data is taken from F1 p1;*Muk* leaf 2). C)  
 690 Numbers of perfect matches to *MuDR* of the indicated size classes to the indicated  
 691 genotypes.

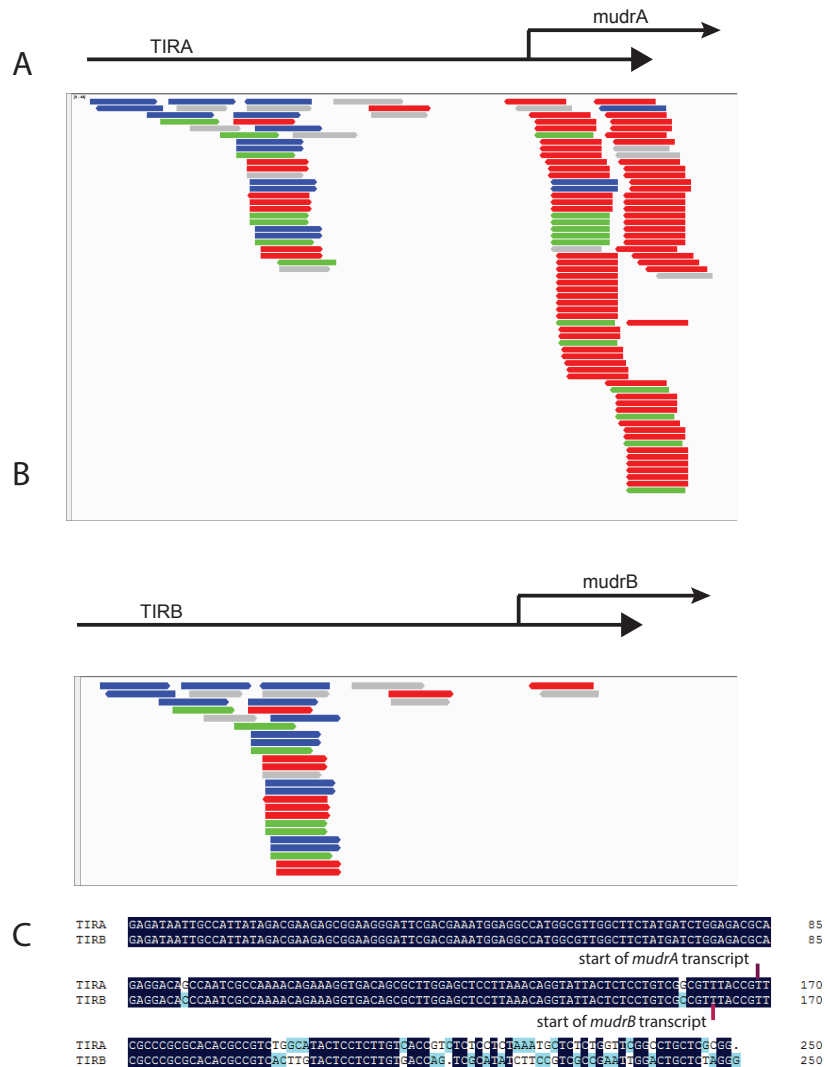

692  
 693 Figure 6. Small RNAs in F2 leaf 2 plants with perfect matches to TIRA (A) and TIRB  
 694 (B). C) An alignment of TIRA and TIRB with the transcriptional start sites for *mudrA*  
 695 and *mudrB* as indicated.  
 696

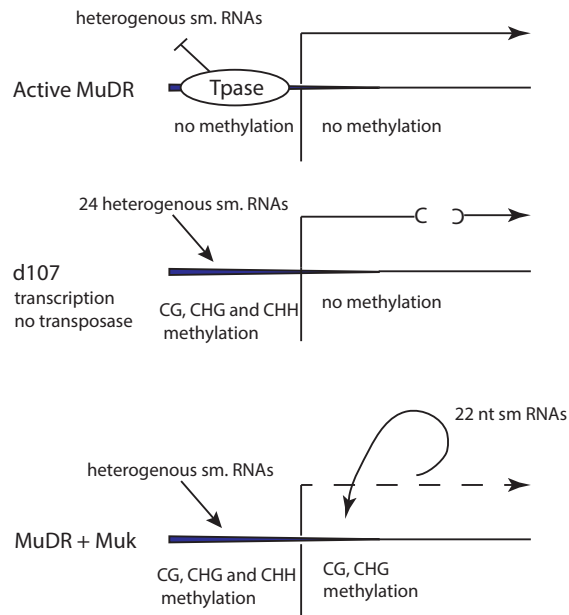

697

698

699 Figure 7. A model for the interaction between different classes of small RNAs and DNA

700 methylation in 5'TIRA and 3'TIRA.

701

702

703

704

705

706

707

708

709

710

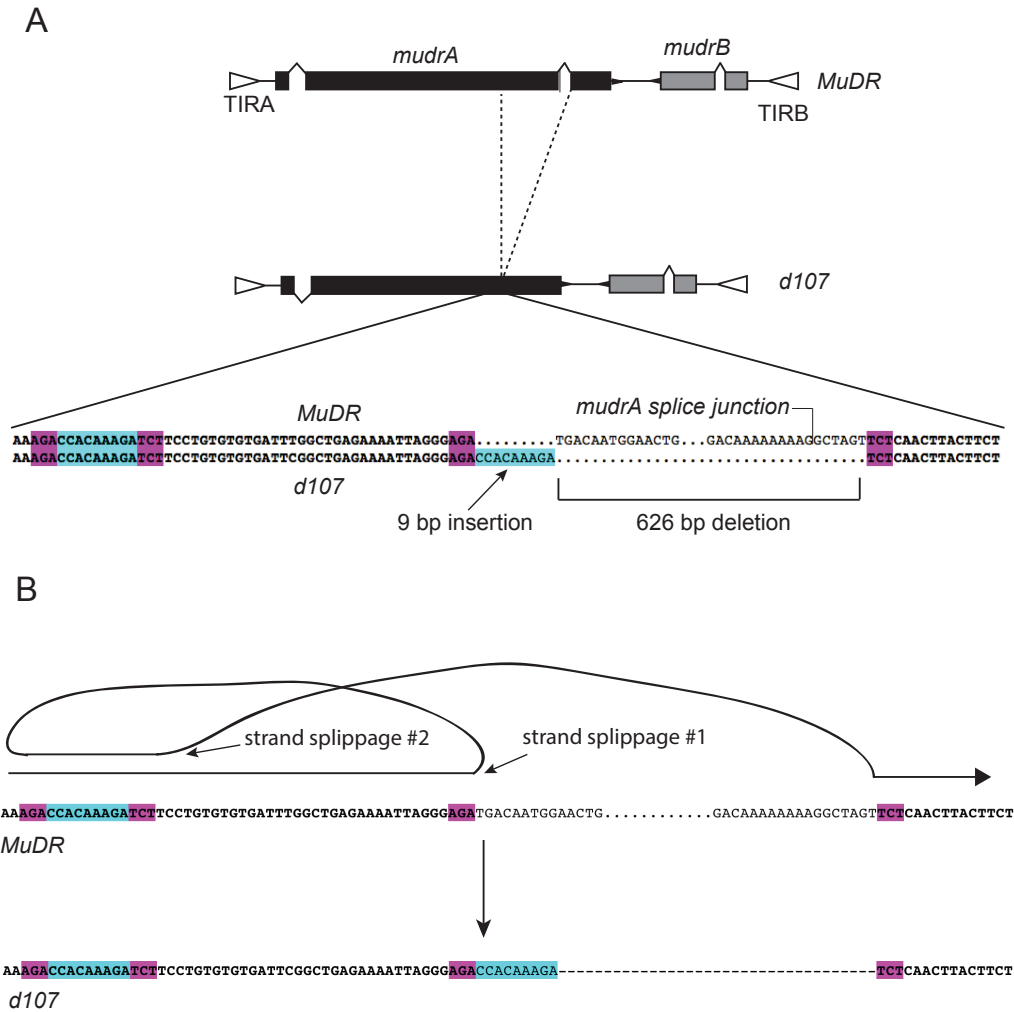

711

712 Figure S1. Sequence analysis of the deletion in *d107*. A) Structure of the progenitor  
 713 (*MuDR*) sequence and that of the deletion derivative. B) Hypothesized mechanism of  
 714 deletion. *MuDR* replication is thought to involve gap repair using the sister chromatid as  
 715 a template (LI *et al.* 2008). To generate the deletion at *d107*, we hypothesize that  
 716 replication proceeded to an AGA triplet, at which point the replicated strand is  
 717 hypothesized to have switched to a second AGA 47 bp upstream. Replication then  
 718 continued until it reached a TCT triplet, at which point replication switched to a second  
 719 TCT triplet 660 bp downstream. The net result was a deletion of 626 bp and the insertion  
 720 of a short (9 bp) upstream sequence at the end of the deletion.



721

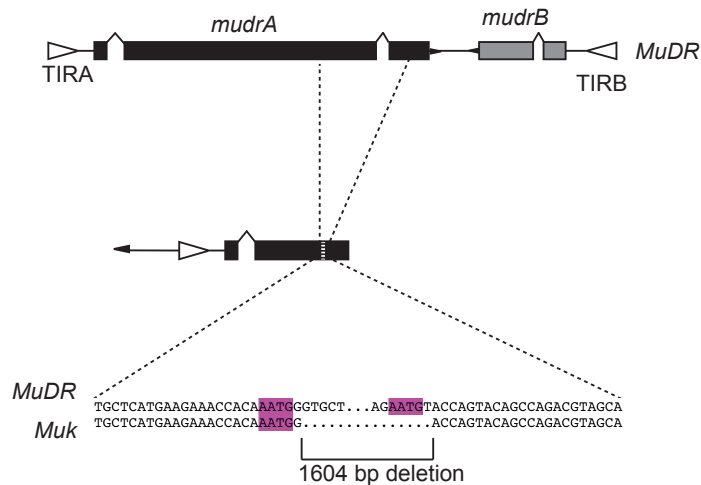

MuDR TGCTCATGAAGAAACCACA AATGGGTGCT...AG AATG TACCAGTACGCCAGCCTAGCA  
 Muk TGCTCATGAAGAAACCACA AATGG.....ACCAGTACGCCAGCCTAGCA  
 Muk\_smRNA ATGG.....ACCAGTACGCCAGCCTAGCA  
 Muk\_smRNA TGGACCAGTACGCCAGCCTAGCA (sense relative to mudrA)  
 Muk\_smRNA ATGGACCAGTACGCCAGCCTAGCA (sense relative to mudrA)

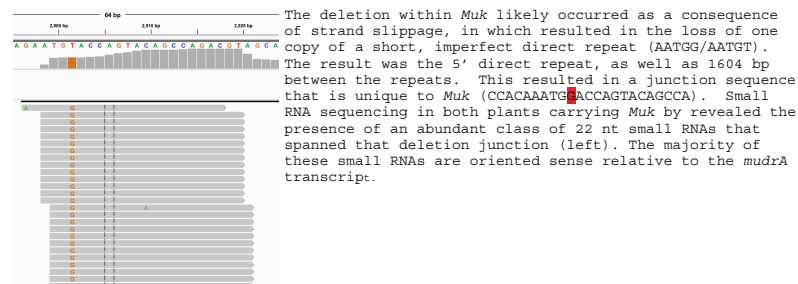

722

723 Figure S2. The sequences flanking the deletion within *Muk*, illustrating polymorphisms  
 724 introduced by that deletion in the small RNA population. As with *d107*, the deletion is  
 725 likely due to strand slippage at a short direct repeat. The result is a *Muk*-specific junction  
 726 sequence that is the source of numerous 22 nt small RNAs.

727

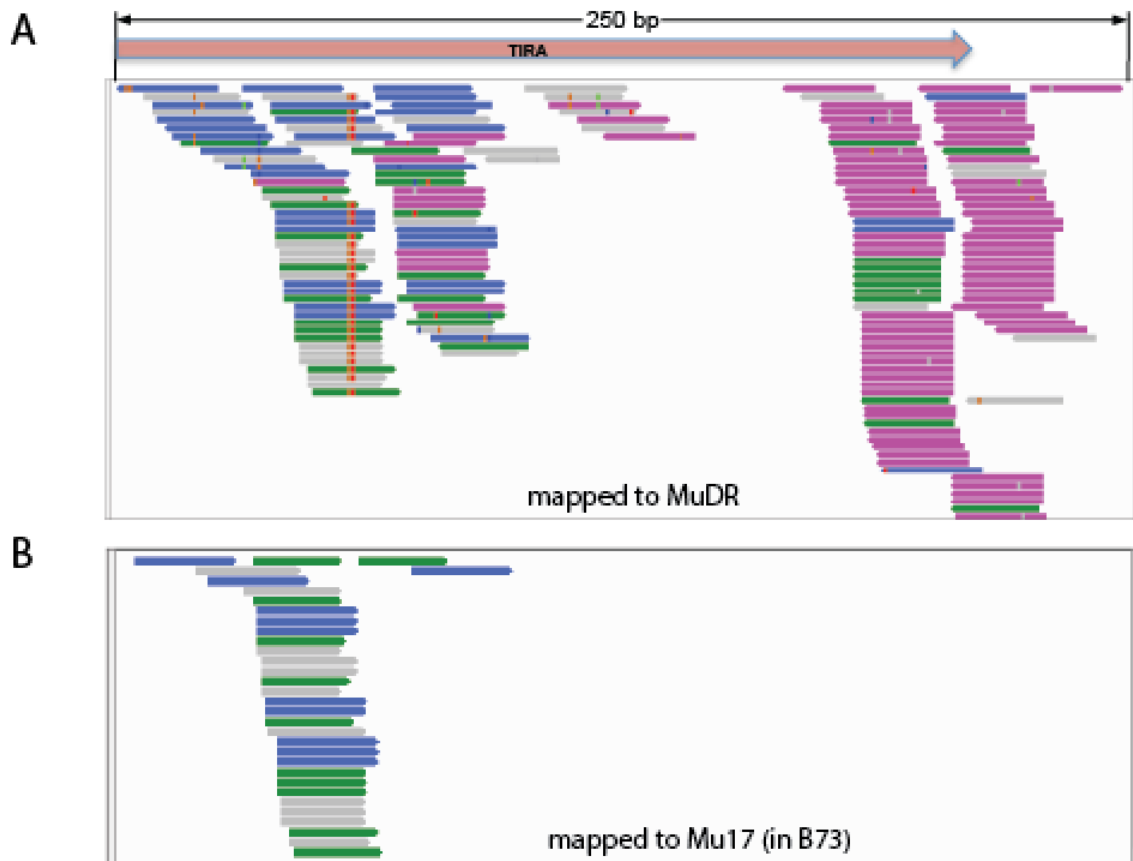

728

729 Figure S3. Distribution of small RNAs matched to the 5' TIR regions of *MuDR(p1)* and  
730 *Mu17*. (A) The small RNAs of F1 (*p1<sup>1/-</sup>; Muk<sup>-/-</sup>*) leaf 2 matching the 5' TIR region of  
731 *MuDR(p1)* with two or fewer mismatches. (B) The small RNAs in F1 leaf 2 that perfectly  
732 match the 5' TIR region of Mu17. Green, pink and blue arrows indicate the small RNA  
733 length of 21 nt, 22 nt and 24 nt, respectively. The grey arrows represent other sizes of  
734 small RNAs.

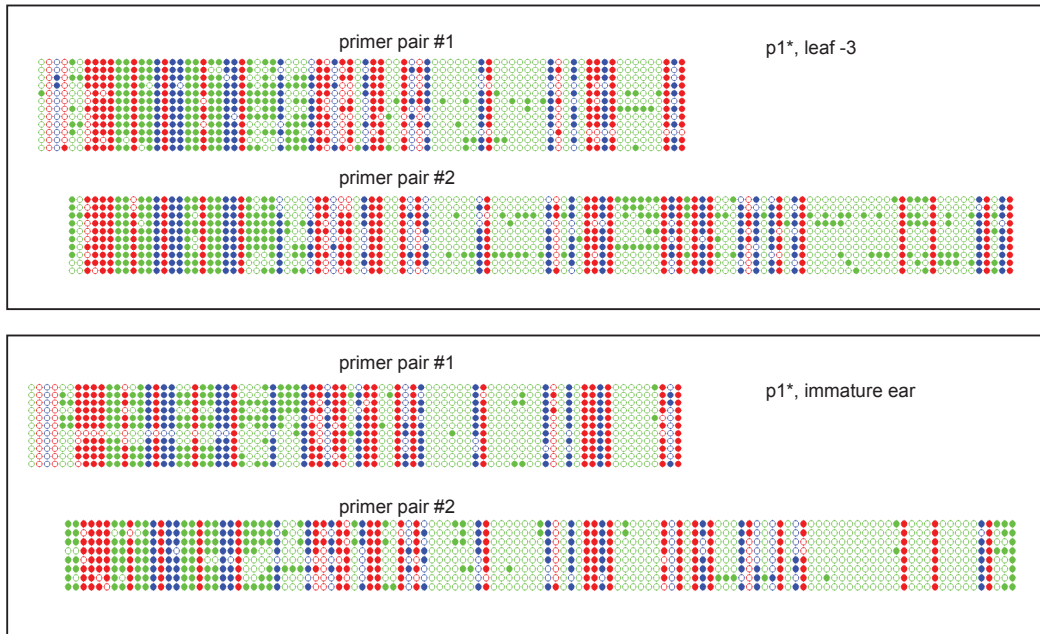

735

736 Figure S4.

737 A comparison of the patterns of methylation at TIRA observed in two tissues of the same

738 plant using two different primer pairs. Note that similar results were observed in both

739 tissues regardless of the primer pairs used.

## References:

- ALLEMAN, M., L. SIDORENKO, K. MCGINNIS, V. SESHADRI, J. E. DORWEILER *et al.*, 2006 An RNA-dependent RNA polymerase is required for paramutation in maize. *Nature* **442**: 295-298.
- BANKS, J. A., P. MASSON and N. FEDOROFF, 1988 Molecular mechanisms in the developmental regulation of the maize Suppressor-mutator transposable element. *Genes Dev* **2**: 1364-1380.
- BARKAN, A., and R. A. MARTIENSSEN, 1991 Inactivation of maize transposon Mu suppresses a mutant phenotype by activating an outward-reading promoter near the end of Mu1. *Proc Natl Acad Sci U S A* **88**: 3502-3506.
- BENITO, M. I., and V. WALBOT, 1997 Characterization of the maize Mutator transposable element MURA transposase as a DNA-binding protein. *Mol Cell Biol* **17**: 5165-5175.
- BENNETZEN, J. L., 1996 The Mutator transposable element system of maize. *Curr Top Microbiol Immunol* **204**: 195-229.
- BUCHER, E., J. REINDERS and M. MIROUZE, 2012 Epigenetic control of transposon transcription and mobility in Arabidopsis. *Curr Opin Plant Biol* **15**: 503-510.
- CHANDLER, V. L., and V. WALBOT, 1986 DNA modification of a maize transposable element correlates with loss of activity. *Proc Natl Acad Sci U S A* **83**: 1767-1771.
- CHOMET, P., D. LISCH, K. J. HARDEMAN, V. L. CHANDLER and M. FREELING, 1991 Identification of a regulatory transposon that controls the Mutator transposable element system in maize. *Genetics* **129**: 261-270.
- CREASEY, K. M., J. ZHAI, F. BORGES, F. VAN EX, M. REGULSKI *et al.*, 2014 miRNAs trigger widespread epigenetically activated siRNAs from transposons in Arabidopsis. *Nature* **508**: 411-415.
- CUERDA-GIL, D., and R. K. SLOTKIN, 2016 Non-canonical RNA-directed DNA methylation. *Nat Plants* **2**: 16163.
- CUI, H., and N. V. FEDOROFF, 2002 Inducible DNA demethylation mediated by the maize Suppressor-mutator transposon-encoded TnpA protein. *Plant Cell* **14**: 2883-2899.
- DALMAY, T., A. HAMILTON, E. MUELLER and D. C. BAULCOMBE, 2000 Potato virus X amplicons in arabidopsis mediate genetic and epigenetic gene silencing. *Plant Cell* **12**: 369-379.
- DOTTO, M. C., K. A. PETSCH, M. J. AUKERMAN, M. BEATTY, M. HAMMELL *et al.*, 2014 Genome-wide analysis of leafbladeless1-regulated and phased small RNAs underscores the importance of the TAS3 ta-siRNA pathway to maize development. *PLoS Genet* **10**: e1004826.
- FULTZ, D., S. G. CHOUDURY and R. K. SLOTKIN, 2015 Silencing of active transposable elements in plants. *Curr Opin Plant Biol* **27**: 67-76.

- FULTZ, D., and R. K. SLOTKIN, 2017 Exogenous Transposable Elements Circumvent Identity-Based Silencing, Permitting the Dissection of Expression-Dependent Silencing. *Plant Cell* **29**: 360-376.
- GRUNTMAN, E., Y. QI, R. K. SLOTKIN, T. ROEDER, R. A. MARTIENSSEN *et al.*, 2008 Kismeth: analyzer of plant methylation states through bisulfite sequencing. *BMC Bioinformatics* **9**: 371.
- HALE, C. J., K. F. ERHARD, JR., D. LISCH and J. B. HOLLICK, 2009 Production and processing of siRNA precursor transcripts from the highly repetitive maize genome. *PLoS Genet* **5**: e1000598.
- HASHIDA, S. N., T. UCHIYAMA, C. MARTIN, Y. KISHIMA, Y. SANO *et al.*, 2006 The temperature-dependent change in methylation of the Antirrhinum transposon Tam3 is controlled by the activity of its transposase. *Plant Cell* **18**: 104-118.
- HERSHBERGER, R. J., M. I. BENITO, K. J. HARDEMAN, C. WARREN, V. L. CHANDLER *et al.*, 1995 Characterization of the major transcripts encoded by the regulatory MuDR transposable element of maize. *Genetics* **140**: 1087-1098.
- HIROCHIKA, H., K. SUGIMOTO, Y. OTSUKI, H. TSUGAWA and M. KANDA, 1996 Retrotransposons of rice involved in mutations induced by tissue culture. *Proc Natl Acad Sci U S A* **93**: 7783-7788.
- HOLOCH, D., and D. MOAZED, 2015 RNA-mediated epigenetic regulation of gene expression. *Nat Rev Genet* **16**: 71-84.
- HSIA, A. P., and P. S. SCHNABLE, 1996 DNA sequence analyses support the role of interrupted gap repair in the origin of internal deletions of the maize transposon, MuDR. *Genetics* **142**: 603-618.
- ITO, H., H. GAUBERT, E. BUCHER, M. MIROUZE, I. VAILLANT *et al.*, 2011 An siRNA pathway prevents transgenerational retrotransposition in plants subjected to stress. *Nature* **472**: 115-119.
- KATO, M., K. TAKASHIMA and T. KAKUTANI, 2004 Epigenetic control of CACTA transposon mobility in *Arabidopsis thaliana*. *Genetics* **168**: 961-969.
- KUMAKURA, N., A. TAKEDA, Y. FUJIOKA, H. MOTOSE, R. TAKANO *et al.*, 2009 SGS3 and RDR6 interact and colocalize in cytoplasmic SGS3/RDR6-bodies. *FEBS Lett* **583**: 1261-1266.
- LANGMEAD, B., C. TRAPNELL, M. POP and S. L. SALZBERG, 2009 Ultrafast and memory-efficient alignment of short DNA sequences to the human genome. *Genome Biology* **10**.
- LAW, J. A., and S. E. JACOBSEN, 2010 Establishing, maintaining and modifying DNA methylation patterns in plants and animals. *Nat Rev Genet* **11**: 204-220.
- LI, H., M. FREELING and D. LISCH, 2010 Epigenetic reprogramming during vegetative phase change in maize. *Proc Natl Acad Sci U S A* **107**: 22184-22189.
- LI, J., T. J. WEN and P. S. SCHNABLE, 2008 Role of RAD51 in the repair of MuDR-induced double-strand breaks in maize (*Zea mays* L.). *Genetics* **178**: 57-66.
- LISCH, D., 1995 Genetic and Molecular Characterization of the Mutator System in maize, pp. 408 in *Plant and Microbial Biology*. University of California, Berkeley, Berkeley, CA.
- LISCH, D., 2002 Mutator transposons. *Trends Plant Sci* **7**: 498-504.

- LISCH, D., 2009 Epigenetic regulation of transposable elements in plants. *Annu Rev Plant Biol* **60**: 43-66.
- LISCH, D., 2015 Mutator and MULE transposons in *Mobile DNA III*, edited by P. R. NL CRAIG, A LAMBOWITZ, M CHANDLER, M GELLERT, S. SANDMEYER. American Society for Microbiology Press, Washington, D.C.
- LISCH, D., C. C. CAREY, J. E. DORWEILER and V. L. CHANDLER, 2002 A mutation that prevents paramutation in maize also reverses Mutator transposon methylation and silencing. *Proc Natl Acad Sci U S A* **99**: 6130-6135.
- LISCH, D., P. CHOMET and M. FREELING, 1995 Genetic characterization of the Mutator system in maize: behavior and regulation of Mu transposons in a minimal line. *Genetics* **139**: 1777-1796.
- LISCH, D., L. GIRARD, M. DONLIN and M. FREELING, 1999 Functional analysis of deletion derivatives of the maize transposon MuDR delineates roles for the MURA and MURB proteins. *Genetics* **151**: 331-341.
- LISCH, D., and N. JIANG, 2008 Mutator and Pack-MULEs, pp. 277-306 in *The maize handbook - Volume II: Domestication, Genetics and Genomics of Maize*, edited by J. L. BENNETZEN and S. HAKE. Springer, New York, NY.
- MARI-ORDONEZ, A., A. MARCHAIS, M. ETCHEVERRY, A. MARTIN, V. COLOT *et al.*, 2013 Reconstructing de novo silencing of an active plant retrotransposon. *Nat Genet* **45**: 1029-1039.
- MARTINEZ, G., K. PANDA, C. KOHLER and R. K. SLOTKIN, 2016 Silencing in sperm cells is directed by RNA movement from the surrounding nurse cell. *Nat Plants* **2**: 16030.
- MARTINEZ, G., and R. K. SLOTKIN, 2012 Developmental relaxation of transposable element silencing in plants: functional or byproduct? *Curr Opin Plant Biol* **15**: 496-502.
- MATSUNAGA, W., N. OHAMA, N. TANABE, Y. MASUTA, S. MASUDA *et al.*, 2015 A small RNA mediated regulation of a stress-activated retrotransposon and the tissue specific transposition during the reproductive period in Arabidopsis. *Front Plant Sci* **6**: 48.
- MATZKE, M. A., and R. A. MOSHER, 2014 RNA-directed DNA methylation: an epigenetic pathway of increasing complexity. *Nat Rev Genet* **15**: 394-408.
- MCCUE, A. D., K. PANDA, S. NUTHIKATTU, S. G. CHOUDURY, E. N. THOMAS *et al.*, 2015 ARGONAUTE 6 bridges transposable element mRNA-derived siRNAs to the establishment of DNA methylation. *EMBO J* **34**: 20-35.
- NOBUTA, K., C. LU, R. SHRIVASTAVA, M. PILLAY, E. DE PAOLI *et al.*, 2008 Distinct size distribution of endogenous siRNAs in maize: Evidence from deep sequencing in the mop1-1 mutant. *Proc Natl Acad Sci U S A* **105**: 14958-14963.
- NUTHIKATTU, S., A. D. MCCUE, K. PANDA, D. FULTZ, C. DEFRAIA *et al.*, 2013 The initiation of epigenetic silencing of active transposable elements is triggered by RDR6 and 21-22 nucleotide small interfering RNAs. *Plant Physiol* **162**: 116-131.
- O'REILLY, C., N. S. SHEPHERD, A. PEREIRA, Z. SCHWARZ-SOMMER, I. BERTRAM *et al.*, 1985 Molecular cloning of the a1 locus of Zea mays using the transposable elements En and Mu1. *EMBO J* **4**: 877-882.

- PANDA, K., L. JI, D. A. NEUMANN, J. DARON, R. J. SCHMITZ *et al.*, 2016 Full-length autonomous transposable elements are preferentially targeted by expression-dependent forms of RNA-directed DNA methylation. *Genome Biol* **17**: 170.
- PANDA, K., and R. K. SLOTKIN, 2013 Proposed mechanism for the initiation of transposable element silencing by the RDR6-directed DNA methylation pathway. *Plant Signal Behav* **8**.
- ROBERTSON, D. S., 1986 Genetic studies on the loss of mu mutator activity in maize. *Genetics* **113**: 765-773.
- RUDENKO, G. N., A. ONO and V. WALBOT, 2003 Initiation of silencing of maize MuDR/Mu transposable elements. *Plant J* **33**: 1013-1025.
- RUDENKO, G. N., and V. WALBOT, 2001 Expression and post-transcriptional regulation of maize transposable element MuDR and its derivatives. *Plant Cell* **13**: 553-570.
- SAZE, H., and T. KAKUTANI, 2011 Differentiation of epigenetic modifications between transposons and genes. *Curr Opin Plant Biol* **14**: 81-87.
- SCHWAB, R., and O. VOINNET, 2010 RNA silencing amplification in plants: size matters. *Proc Natl Acad Sci U S A* **107**: 14945-14946.
- SIGMAN, M. J., and R. K. SLOTKIN, 2016 The First Rule of Plant Transposable Element Silencing: Location, Location, Location. *Plant Cell* **28**: 304-313.
- SINGH, J., M. FREELING and D. LISCH, 2008 A position effect on the heritability of epigenetic silencing. *PLoS Genet* **4**: e1000216.
- SKIBBE, D. S., J. F. FERNANDES and V. WALBOT, 2012 Mu killer-Mediated and Spontaneous Silencing of Zea mays Mutator Family Transposable Elements Define Distinctive Paths of Epigenetic Inactivation. *Front Plant Sci* **3**: 212.
- SLOTKIN, R. K., 2005 The Heritable silencing of Mutator Transposons by Mu killer, pp. 223 in *Plant and Microbial Biology*. University of California, Berkeley, Berkeley, CA.
- SLOTKIN, R. K., M. FREELING and D. LISCH, 2003 Mu killer causes the heritable inactivation of the Mutator family of transposable elements in Zea mays. *Genetics* **165**: 781-797.
- SLOTKIN, R. K., M. FREELING and D. LISCH, 2005 Heritable transposon silencing initiated by a naturally occurring transposon inverted duplication. *Nat Genet* **37**: 641-644.
- SLOTKIN, R. K., and R. MARTIENSSEN, 2007 Transposable elements and the epigenetic regulation of the genome. *Nat Rev Genet* **8**: 272-285.
- SLOTKIN, R. K., M. VAUGHN, F. BORGES, M. TANURDZIC, J. D. BECKER *et al.*, 2009 Epigenetic reprogramming and small RNA silencing of transposable elements in pollen. *Cell* **136**: 461-472.
- TAN, B. C., Z. CHEN, Y. SHEN, Y. ZHANG, J. LAI *et al.*, 2011 Identification of an active new mutator transposable element in maize. *G3 (Bethesda)* **1**: 293-302.
- WOODHOUSE, M. R., M. FREELING and D. LISCH, 2006 Initiation, establishment, and maintenance of heritable MuDR transposon silencing in maize are mediated by distinct factors. *PLoS Biol* **4**: e339.



WU, L., L. MAO and Y. QI, 2012 Roles of dicer-like and argonaute proteins in TAS-derived small interfering RNA-triggered DNA methylation. *Plant Physiol* **160**: 990-999.

ZHAO, Z. Y., and V. SUNDARESAN, 1991 Binding sites for maize nuclear proteins in the terminal inverted repeats of the Mu1 transposable element. *Mol Gen Genet* **229**: 17-26.



Supplemental Table 1. Genetic interaction between a silenced and an active *MuDR* element.  
grown from spotted seed <sup>a</sup>

|                      | p1* | p4  | spotted | pale | total | %spot | Chi square |
|----------------------|-----|-----|---------|------|-------|-------|------------|
| 2                    | yes | yes | 134     | 111  | 245   | 55%   | 0.14172    |
| 3                    | yes | yes | 8       | 12   | 20    | 40%   | 0.37109    |
| 4                    | yes | yes | 167     | 160  | 327   | 51%   | 0.69868    |
| 5                    | yes | yes | 261     | 239  | 500   | 52%   | 0.32518    |
| 6                    | yes | yes | 74      | 78   | 152   | 49%   | 0.74560    |
| 8                    | yes | yes | 119     | 110  | 229   | 52%   | 0.55202    |
| total                | yes | yes | 763     | 710  | 1473  | 52%   | 0.16730    |
| 1                    | no  | yes | 166     | 165  | 331   | 50%   | 0.95617    |
| 7                    | no  | yes | 45      | 50   | 95    | 47%   | 0.60796    |
| 9                    | no  | yes | 185     | 182  | 367   | 50%   | 0.87556    |
| 10                   | no  | yes | 143     | 122  | 265   | 54%   | 0.19704    |
| 11                   | no  | yes | 103     | 93   | 196   | 53%   | 0.47505    |
| 13                   | no  | yes | 45      | 46   | 91    | 49%   | 0.91651    |
| 14                   | no  | yes | 186     | 208  | 394   | 47%   | 0.26771    |
| total                | no  | yes | 873     | 866  | 1739  | 50%   | 0.86669    |
| grown from pale seed |     |     |         |      |       |       |            |
|                      | p1  | p4  | spotted | pale | total | %spot |            |
| 1                    | yes |     | 0       | 80   | 80    | 0%    |            |
| 2                    | yes |     | 0       | 154  | 154   | 0%    |            |
| 3                    | yes |     | 0       | 234  | 234   | 0%    |            |
| 5                    | yes |     | 0       | 322  | 322   | 0%    |            |
| 6                    | yes |     | 0       | 456  | 456   | 0%    |            |
| 9                    | yes |     | 0       | 429  | 429   | 0%    |            |
| 12                   | yes |     | 0       | 168  | 168   | 0%    |            |
| 17                   | yes |     | 0       | 224  | 224   | 0%    |            |
| total                |     |     |         | 2067 | 2067  |       |            |
| 4                    | no  |     | 0       | 187  | 187   | 0%    |            |
| 7                    | no  |     | 0       | 428  | 428   | 0%    |            |
| 8                    | no  |     | 0       | 176  | 176   | 0%    |            |
| 10                   | no  |     | 0       | 337  | 337   | 0%    |            |
| 13                   | no  |     | 0       | 169  | 169   | 0%    |            |
| 14                   | no  |     | 0       | 154  | 154   | 0%    |            |
| 15                   | no  |     | 0       | 165  | 165   | 0%    |            |
| 16                   | no  |     | 0       | 272  | 272   | 0%    |            |
| 18                   | no  |     | 0       | 468  | 468   | 0%    |            |
| total                |     |     | 0       | 2356 | 2356  | 0%    |            |

<sup>a</sup> A plant carrying p1\* and p4 was crossed to a tester. The resulting seed was separated into spotted and pale progeny, genotyped for p1\* and p4 and test crossed giving the resulting spotted and pale progeny seeds.





Supplemental Table 2. Small RNAs in plants with and without *MuDR* and *Muk*.

|             | Replicate 1 (TPM) <sup>b</sup>  |                  |                 |          |          | Repli                           |                  |
|-------------|---------------------------------|------------------|-----------------|----------|----------|---------------------------------|------------------|
|             | no <i>MuDR</i><br>or <i>Muk</i> | <i>MuDR</i> only | <i>Muk</i> only | F1 leaf2 | F1 leaf6 | no <i>MuDR</i><br>or <i>Muk</i> | <i>MuDR</i> only |
| <b>MuDR</b> |                                 |                  |                 |          |          |                                 |                  |
| 18-nt       | 0.00                            | 0.00             | 6.11            | 1.67     | 1.38     | 1.63                            | 0.00             |
| 19-nt       | 0.00                            | 0.29             | 8.55            | 1.11     | 4.15     | 0.81                            | 0.00             |
| 20-nt       | 1.58                            | 0.00             | 11.91           | 3.33     | 1.38     | 0.00                            | 0.00             |
| 21-nt       | 7.13                            | 0.29             | 35.44           | 16.11    | 16.61    | 1.63                            | 0.00             |
| 22-nt       | 11.08                           | 0.29             | 194.60          | 60.00    | 19.37    | 4.07                            | 0.00             |
| 23-nt       | 0.79                            | 0.00             | 8.86            | 2.22     | 1.38     | 0.81                            | 0.00             |
| 24-nt       | 1.58                            | 1.75             | 15.89           | 4.44     | 4.15     | 1.63                            | 0.00             |
| 25-nt       | 0.00                            | 0.29             | 1.22            | 0.56     | 1.38     | 0.00                            | 0.00             |
| 26-nt       | 0.00                            | 0.00             | 0.00            | 0.56     | 0.00     | 0.00                            | 0.00             |
| <b>Muk</b>  |                                 |                  |                 |          |          |                                 |                  |
| 18-nt       | 0.00                            | 0.00             | 5.19            | 1.11     | 1.38     | 1.63                            | 0.00             |
| 19-nt       | 0.00                            | 0.29             | 6.42            | 0.56     | 2.77     | 0.81                            | 0.00             |
| 20-nt       | 0.79                            | 0.00             | 9.78            | 1.11     | 1.38     | 0.00                            | 0.00             |
| 21-nt       | 4.75                            | 0.29             | 35.74           | 11.67    | 12.45    | 1.63                            | 0.00             |
| 22-nt       | 11.88                           | 0.29             | 185.44          | 53.33    | 19.37    | 3.26                            | 0.00             |
| 23-nt       | 0.00                            | 0.00             | 8.25            | 0.00     | 1.38     | 0.81                            | 0.00             |
| 24-nt       | 1.58                            | 0.58             | 7.64            | 1.67     | 2.77     | 0.00                            | 0.00             |
| 25-nt       | 0.00                            | 0.00             | 0.92            | 0.56     | 0.00     | 0.00                            | 0.00             |
| 26-nt       | 0.00                            | 0.00             | 0.00            | 0.56     | 0.00     | 0.00                            | 0.00             |

<sup>a</sup>Small RNA reads matching *t/r/sn/snoRNAs* were removed before normalization.

<sup>b</sup>Transcripts per million reads.

---

icate 2 (TPM)<sup>b</sup>

---

| Muk only | F1 leaf2 | F1 leaf6 |
|----------|----------|----------|
| 4.15     | 9.90     | 2.46     |
| 9.35     | 6.97     | 1.64     |
| 12.98    | 11.00    | 1.64     |
| 30.12    | 81.75    | 22.97    |
| 131.89   | 297.31   | 60.71    |
| 2.60     | 9.16     | 1.64     |
| 12.98    | 24.56    | 6.56     |
| 0.00     | 0.37     | 0.82     |
| 0.00     | 0.00     | 0.00     |
| 3.63     | 7.33     | 1.64     |
| 7.27     | 4.03     | 0.82     |
| 11.42    | 8.43     | 1.64     |
| 31.16    | 51.69    | 15.59    |
| 133.97   | 271.28   | 52.51    |
| 2.08     | 6.23     | 1.64     |
| 7.27     | 11.36    | 3.28     |
| 0.00     | 0.37     | 0.82     |
| 0.00     | 0.00     | 0.00     |

---

### **MuDR**

| size | Sense <sup>a</sup> | Antisense | Ratio | total |
|------|--------------------|-----------|-------|-------|
| 18   | 17                 | 12        | 1.42  | 29    |
| 19   | 10                 | 9         | 1.11  | 19    |
| 20   | 14                 | 19        | 0.74  | 33    |
| 21   | 125                | 104       | 1.20  | 229   |
| 22   | 359                | 462       | 0.78  | 821   |
| 23   | 18                 | 8         | 2.25  | 26    |
| 24   | 57                 | 23        | 2.48  | 80    |

### **mudrA**

|    | Sense | Antisense | Ratio |     |
|----|-------|-----------|-------|-----|
| 18 | 14    | 10        | 1.40  | 24  |
| 19 | 10    | 9         | 1.11  | 19  |
| 20 | 11    | 17        | 0.65  | 28  |
| 21 | 119   | 97        | 1.23  | 216 |
| 22 | 349   | 453       | 0.77  | 802 |
| 23 | 16    | 7         | 2.29  | 23  |
| 24 | 44    | 9         | 4.89  | 53  |

### **shared by MuDR and Muk**

|    | Sense | Antisense | Ratio | total |
|----|-------|-----------|-------|-------|
| 18 | 12    | 10        | 1.20  | 22    |
| 19 | 6     | 8         | 0.75  | 14    |
| 20 | 10    | 15        | 0.67  | 25    |
| 21 | 83    | 67        | 1.24  | 150   |
| 22 | 320   | 404       | 0.79  | 724   |
| 23 | 17    | 6         | 2.83  | 23    |
| 24 | 55    | 10        | 5.50  | 65    |

### **specific to MuDR**

|    | Sense | Antisense | Ratio | total |
|----|-------|-----------|-------|-------|
| 18 | 5     | 0         | na    | 5     |
| 19 | 4     | 1         | 4.00  | 5     |
| 20 | 3     | 2         | 1.50  | 5     |
| 21 | 41    | 31        | 1.32  | 72    |
| 22 | 36    | 50        | 0.72  | 86    |
| 23 | 1     | 1         | 1.00  | 2     |
| 24 | 0     | 1         | 0.00  | 1     |

Supplemental Table 3. Small RNAs matching TIRA, 5'TIRA and 3'TIRA

### **TIRA**

|    | Sense | Antisense | Ratio | total |
|----|-------|-----------|-------|-------|
| 18 | 3     | 1         | 3.00  | 4     |
| 19 | 0     | 0         | ba    | 0     |
| 20 | 2     | 3         | 0.67  | 5     |
| 21 | 7     | 13        | 0.54  | 20    |
| 22 | 12    | 68        | 0.18  | 80    |
| 23 | 2     | 1         | 2.00  | 3     |

24 11 5 2.20 16

### 5'TIRA

|    | Sense | Antisense | ratio | total |
|----|-------|-----------|-------|-------|
| 18 | 3     | 0         | na    | 3     |
| 19 | 0     | 0         | na    | 0     |
| 20 | 2     | 0         | na    | 2     |
| 21 | 6     | 1         | 6     | 7     |
| 22 | 8     | 1         | 8     | 9     |
| 23 | 2     | 0         | na    | 2     |
| 24 | 11    | 2         | 5.5   | 13    |

### 3'TIRA

|    | Sense | Antisense | ratio | total |
|----|-------|-----------|-------|-------|
| 18 | 0     | 1         | 0.00  | 1     |
| 19 | 0     | 0         | na    | 0     |
| 20 | 0     | 3         | 0.00  | 3     |
| 21 | 1     | 12        | 0.08  | 13    |
| 22 | 4     | 67        | 0.06  | 71    |
| 23 | 0     | 1         | 0.00  | 1     |
| 24 | 0     | 3         | 0.00  | 3     |

### Summary for 22 and 21 nt small RNAs

|                 | 22  | 21  | ratio |
|-----------------|-----|-----|-------|
| <i>MuDR</i>     | 821 | 229 | 3.59  |
| <i>mudrA</i>    | 802 | 216 | 3.71  |
| shared          | 724 | 150 | 4.83  |
| <i>MuDR sp.</i> | 86  | 72  | 1.19  |
| TIRA            | 80  | 20  | 4.00  |
| 5'TIRA          | 9   | 7   | 1.29  |
| 3'TIRA          | 71  | 13  | 5.46  |

<sup>a</sup> sense and antisense reads per million reads. Exact matches only



Supplemental Table 4. Comparison of small RNAs mapped to 5'TIRA and 3'TIRA of *MuDR(p1)* allowing two mismatches

| Small RNA length | mop1-1 immature ear <sup>a</sup> |       |                    |                      |       |       | lbl1 leaf |       |       |
|------------------|----------------------------------|-------|--------------------|----------------------|-------|-------|-----------|-------|-------|
|                  | wild type                        |       |                    | <i>mop1-1</i> mutant |       |       | wild type |       |       |
|                  | 5TIRA                            | 3TIRA | Ratio <sup>c</sup> | 5TIRA                | 3TIRA | Ratio | 5TIRA     | 3TIRA | Ratio |
| 18-nt            | 0.2                              | 0.0   | nd                 | 1.1                  | 0.0   | nd    | 1.1       | 0.1   | 13.0  |
| 19-nt            | 0.7                              | 0.3   | 2.0                | 4.8                  | 0.0   | nd    | 1.6       | 0.1   | 19.0  |
| 20-nt            | 0.7                              | 0.3   | 2.0                | 44.5                 | 0.0   | nd    | 2.3       | 0.1   | 26.0  |
| 21-nt            | 5.2                              | 0.3   | 15.0               | 41.0                 | 1.7   | 24.3  | 7.5       | 0.2   | 43.0  |
| 22-nt            | 3.0                              | 0.9   | 3.4                | 2.2                  | 2.1   | 1.1   | 4.1       | 0.2   | 23.5  |
| 23-nt            | 11.5                             | 3.5   | 3.3                | 0.6                  | 0.4   | 1.3   | 9.5       | 0.4   | 22.0  |
| 24-nt            | 51.3                             | 8.3   | 6.1                | 5.8                  | 1.5   | 3.7   | 83.7      | 4.4   | 18.9  |
| 25-nt            | 1.2                              | 0.0   | nd                 | 0.1                  | 0.3   | 0.5   | 1.2       | 0.0   | nd    |
| 26-nt            | 0.0                              | 0.0   | nd                 | 0.1                  | 0.0   | nd    | 0.0       | 0.0   | nd    |

<sup>a</sup>The data used here was derived from Nobuta et al., 2008.

<sup>b</sup>The data used here was derived from Dotto et al., 2014, replicate 1.

<sup>c</sup>Ratio of no. of small RNAs mapped to 5TIRA to no. of small RNAs mapped to 3TIRA; nd, not determined.

Comparison of small RNAs mapped to 5'TIRA and 3'TIRA of *MuDR(p1)* with zero mismatches in different libraries

| Small RNA length | mop1-1 immature ear <sup>a</sup> |       |                    |                      |       |       | lbl1 leaf |       |       |
|------------------|----------------------------------|-------|--------------------|----------------------|-------|-------|-----------|-------|-------|
|                  | wild type                        |       |                    | <i>mop1-1</i> mutant |       |       | wild type |       |       |
|                  | 5TIRA                            | 3TIRA | Ratio <sup>c</sup> | 5TIRA                | 3TIRA | Ratio | 5TIRA     | 3TIRA | Ratio |
| 18-nt            | 0.0                              | 0.0   | nd                 | 0.0                  | 0.0   | nd    | 0.2       | 0.0   | nd    |
| 19-nt            | 0.0                              | 0.0   | nd                 | 0.0                  | 0.0   | nd    | 0.1       | 0.0   | nd    |
| 20-nt            | 0.0                              | 0.0   | nd                 | 0.1                  | 0.0   | nd    | 0.5       | 0.0   | nd    |
| 21-nt            | 0.5                              | 0.0   | nd                 | 1.8                  | 0.6   | 3.3   | 0.5       | 0.0   | nd    |
| 22-nt            | 0.0                              | 0.0   | nd                 | 1.0                  | 0.8   | 1.2   | 0.3       | 0.0   | nd    |
| 23-nt            | 0.5                              | 0.0   | nd                 | 0.3                  | 0.1   | 2.0   | 0.3       | 0.1   | 4.0   |
| 24-nt            | 3.3                              | 0.0   | nd                 | 2.7                  | 1.0   | 2.7   | 2.0       | 1.0   | 2.1   |
| 25-nt            | 0.0                              | 0.0   | nd                 | 0.1                  | 0.1   | 1.0   | 0.0       | 0.0   | nd    |
| 26-nt            | 0.0                              | 0.0   | nd                 | 0.0                  | 0.0   | nd    | 0.0       | 0.0   | nd    |

Comparison of small RNAs mapped to TIRA and TIRB of *MuDR(p1)* allowing two mismatches in different libraries

| Small RNA length | mop1-1 immature ear <sup>a</sup> |      |                    |                      |      |       | lbl1 leaf |      |       |
|------------------|----------------------------------|------|--------------------|----------------------|------|-------|-----------|------|-------|
|                  | wild type                        |      |                    | <i>mop1-1</i> mutant |      |       | wild type |      |       |
|                  | TIRA                             | TIRB | Ratio <sup>c</sup> | TIRA                 | TIRB | Ratio | TIRA      | TIRB | Ratio |
| 18-nt            | 0.2                              | 0.2  | 1.0                | 1.1                  | 1.1  | 1.0   | 1.0       | 0.7  | 1.4   |
| 19-nt            | 1.0                              | 1.2  | 0.9                | 4.8                  | 4.9  | 1.0   | 1.6       | 1.6  | 1.0   |
| 20-nt            | 0.7                              | 0.5  | 1.3                | 44.3                 | 44.5 | 1.0   | 1.7       | 1.7  | 1.0   |
| 21-nt            | 4.9                              | 3.7  | 1.3                | 39.3                 | 39.6 | 1.0   | 7.1       | 6.5  | 1.1   |
| 22-nt            | 3.3                              | 2.6  | 1.3                | 1.3                  | 1.3  | 1.0   | 3.8       | 3.9  | 1.0   |
| 23-nt            | 11.3                             | 10.1 | 1.1                | 0.4                  | 0.6  | 0.8   | 9.3       | 9.3  | 1.0   |
| 24-nt            | 49.2                             | 47.5 | 1.0                | 3.4                  | 3.1  | 1.1   | 82.2      | 79.4 | 1.0   |
| 25-nt            | 1.2                              | 0.5  | 2.3                | 0.1                  | 0.3  | 0.5   | 1.2       | 1.2  | 1.0   |
| 26-nt            | 0.0                              | 0.0  | nd                 | 0.1                  | 0.3  | 0.5   | 0.0       | 0.0  | nd    |

Comparisons of small RNAs mapped to **TIRA and TIRB** of *MuDR(p1)* with **zero mismatches** in different libraries

| Small RNA<br>length | mop1-1 immature ear <sup>a</sup> |      |                    |                      |      |       | lbl1 leaf |      |       |
|---------------------|----------------------------------|------|--------------------|----------------------|------|-------|-----------|------|-------|
|                     | wild type                        |      |                    | <i>mop1-1</i> mutant |      |       | wild type |      |       |
|                     | TIRA                             | TIRB | Ratio <sup>c</sup> | TIRA                 | TIRB | Ratio | TIRA      | TIRB | Ratio |
| 18-nt               | 0.0                              | 0.0  | nd                 | 0.0                  | 0.0  | nd    | 0.2       | 0.2  | 1.0   |
| 19-nt               | 0.0                              | 0.0  | nd                 | 0.0                  | 0.0  | nd    | 0.1       | 0.1  | 1.0   |
| 20-nt               | 0.0                              | 0.0  | nd                 | 0.1                  | 0.1  | 1.0   | 0.5       | 0.5  | 1.0   |
| 21-nt               | 0.5                              | 0.5  | 1.0                | 1.8                  | 2.0  | 0.9   | 0.5       | 0.5  | 1.0   |
| 22-nt               | 0.0                              | 0.0  | nd                 | 1.1                  | 1.3  | 0.9   | 0.3       | 0.3  | 1.0   |
| 23-nt               | 0.5                              | 0.5  | 1.0                | 0.3                  | 0.1  | 2.0   | 0.4       | 0.3  | 1.3   |
| 24-nt               | 3.3                              | 4.3  | 0.8                | 2.9                  | 3.6  | 0.8   | 2.8       | 2.1  | 1.3   |
| 25-nt               | 0.0                              | 0.0  | nd                 | 0.3                  | 0.1  | 2.0   | 0.0       | 0.0  | nd    |
| 26-nt               | 0.0                              | 0.0  | nd                 | 0.0                  | 0.0  | nd    | 0.0       | 0.0  | nd    |

mismatches in different libraries

| apex <sup>b</sup>  |       |       |
|--------------------|-------|-------|
| <i>lbl1</i> mutant |       |       |
| 5TIRA              | 3TIRA | Ratio |
| 1.1                | 0.0   | nd    |
| 3.2                | 0.2   | 14.0  |
| 3.6                | 0.0   | nd    |
| 9.3                | 0.0   | nd    |
| 3.9                | 0.5   | 8.5   |
| 16.4               | 0.0   | nd    |
| 115.4              | 4.1   | 28.2  |
| 1.4                | 0.0   | nd    |
| 0.0                | 0.0   | nd    |

varies

| apex <sup>b</sup>  |       |       |
|--------------------|-------|-------|
| <i>lbl1</i> mutant |       |       |
| 5TIRA              | 3TIRA | Ratio |
| 0.0                | 0.0   | nd    |
| 0.5                | 0.2   | 2.0   |
| 1.1                | 0.0   | nd    |
| 1.1                | 0.0   | nd    |
| 0.0                | 0.0   | nd    |
| 0.2                | 0.0   | nd    |
| 2.3                | 0.9   | 2.5   |
| 0.0                | 0.0   | nd    |
| 0.0                | 0.0   | nd    |

varies

| apex <sup>b</sup>  |       |       |
|--------------------|-------|-------|
| <i>lbl1</i> mutant |       |       |
| TIRA               | TIRB  | Ratio |
| 1.1                | 1.1   | 1.0   |
| 2.7                | 2.7   | 1.0   |
| 2.5                | 2.5   | 1.0   |
| 8.2                | 8.2   | 1.0   |
| 4.1                | 4.1   | 1.0   |
| 16.2               | 15.9  | 1.0   |
| 114.5              | 113.5 | 1.0   |
| 1.4                | 1.1   | 1.2   |
| 0.0                | 0.0   | nd    |

3S

| apex <sup>b</sup>  |      |       |
|--------------------|------|-------|
| <i>lbl1</i> mutant |      |       |
| TIRA               | TIRB | Ratio |
| 0.0                | 0.0  | nd    |
| 0.5                | 0.5  | 1.0   |
| 1.1                | 1.1  | 1.0   |
| 1.1                | 1.1  | 1.0   |
| 0.0                | 0.0  | nd    |
| 0.2                | 0.2  | 1.0   |
| 3.0                | 2.5  | 1.2   |
| 0.0                | 0.0  | nd    |
| 0.0                | 0.0  | nd    |

| primer name | primer sequence            |
|-------------|----------------------------|
| Mu1bis1     | TACARCACRTACRCCARCACC      |
| a1mum2bis1  | GYGAGTGTTTAAGGTTGGTAGGTA   |
| a1mum2bis2  | GATYGAYGAYGGTGTGATATATAATG |
| p1bis2F     | GTTGGYGAGGAGGAGYAYGAGGTG   |
| TIRAbis2R   | CARCTCCCRARAACACTCCAATTC   |
| TIRAmF6     | TYAGGGAAYTGGAGYGAYGGGTG    |
| p1bis2F     | GTTGGYGAGGAGGAGYAYGAGGTG   |
| TIRAbis2R   | CARCTCCCRARAACACTCCAATTC   |
| p1bis7Fmed  | GGGTGTTTGGTTGAGAYGAGATA    |
| RLTIR2      | ATGTCGACCCCTAGAGCA         |
| EX1         | ACATCCACGCTGTCTCAGCC       |
| p4flankB    | CGTGAAAGGTGGAGACTACTGGAA   |
| p5flankB    | CGATTAAGCGCGACGAACACG      |
